# Supplementary material for: Geohistorical records of the Anthropocene in Chile
Source: Oxford University Press journal article supplement (doi:10.1525/elementa.353), 2019-01-01
Supplement: elementa-7-353-s2.xlsx [file elementa-7-353-s2.xlsx]

## Sheet: Northern Chile Database
Supplemental Data 1
Article title: Geohistorical records of the Anthropocene in Chile
Eugenia M. Gayo1,2,3*, Virginia B. McRostie4, Roberto Campbell4, Carola Flores1,5, Antonio Maldonado5,6, Mauricio Uribe-Rodriguez7, Patricio I. Moreno1,8, Calogero M. Santoro9, Duncan A. Christie1,10, Ariel A. Muñoz1,11, Laura Gallardo1,12
1 Center for Climate and Resilience Research (CR2, FONDAP 15110009), Chile, 2 Laboratory for Stable Isotope Biogeochemistry, Departamento de Oceanografía, Universidad de Concepción, Concepción, Chile, 3 Center of Applied Ecology and Sustainability (CAPES), 4 Programa de Antropología, Instituto de Sociología, Pontificia Universidad Católica de Chile, Santiago, Chile, 5 Centro de Estudios Avanzados…
Dataset 1: Chronological determinations used for reconstructing paleodemographic trends in the Northern Chile region over the past 3,000 years
Site	Environment / Locality	ID Sample	Material	Dating Method	Uncalibrated Age	Standard Error	Source
Tambo Chungara	Exoreic Inland	Beta-200947	Charcoal	14C	200	50	Gayo et al 2015
Pica 8	Endoreic Inland	IVIC-174	Maize	14C	220	80	Gayo et al 2015
Tarapaca 13A	Endoreic Inland	GaK-3896	Plant material	14C	220	80	Gayo et al 2015
Caleta Vitor 6	Exoreic Atacama Coast	UGAMS-10521	Peach	14C	228	70	Gayo et al 2015
Tarapaca 49	Endoreic Inland	Beta-294703	Plant material	14C	240	30	Gayo et al 2015
Camarones 9	Exoreic Atacama Coast	Beta-226519	Wood	14C	270	40	Gayo et al 2015
Azapa 8	Exoreic Inland	UCLA-1294B	Camelid fiber textile	14C	280	80	Gayo et al 2015
Abra	Endoreic Inland	Beta-113507	Charcoal	14C	290	50	Gayo et al 2015
Zapahuira Kancha	Exoreic Inland	Beta-189245	Charcoal	14C	290	50	Gayo et al 2015
Lluta 19	Exoreic Inland	Beta-336650	Seed	14C	290	30	Gayo et al 2015
Camarones 9	Exoreic Atacama Coast	Beta-226520	Wood	14C	300	70	Gayo et al 2015
Pica 8	Endoreic Inland	IVIC-172	Maize	14C	310	110	Gayo et al 2015
Lipiche alero 1	Exoreic Inland	UCIAMS-123253	Charcoal	14C	325	20	Gayo et al 2015
Cobija 1 Norte	Endoreic Atacama Coast	Beta-226032	N/A	14C	330	40	Gayo et al 2015
Lluta 13	Exoreic Inland	UGAMS-2957	Charcoal	14C	330	30	Gayo et al 2015
Molle Pampa Este	Exoreic Inland	Beta-101497	Charcoal	14C	340	80	Gayo et al 2015
Tarapaca Viejo	Endoreic Inland	Beta-269050	Grain of wheat	14C	350	40	Gayo et al 2015
Tarapaca Viejo	Endoreic Inland	Beta-269052	Kernel of corn	14C	350	40	Gayo et al 2015
Zapahuira Kancha	Exoreic Inland	Beta-200945	Charcoal	14C	350	50	Gayo et al 2015
Las Cuevas 4	Exoreic Inland	I-12836	Wood	14C	350	70	Gayo et al 2015
Salar de Llamara 11	Endoreic Inland	UCIAMS-123263	Wood	14C	355	15	Gayo et al 2015
Curiyuni Alero 7	Exoreic Inland	UCIAMS-123152	Charcoal	14C	360	20	Gayo et al 2015
Lluta 94	Exoreic Inland	Beta-336656	Maize	14C	360	30	Gayo et al 2015
Tarapaca Viejo	Endoreic Inland	Beta-294704	Charcoal	14C	370	38	Gayo et al 2015
Tarapaca 50	Endoreic Inland	Beta-294704	Plant material	14C	370	30	Gayo et al 2015
Lluta 93	Exoreic Inland	Beta-294877	Charcoal	14C	370	30	Gayo et al 2015
Cobija 1 Norte	Endoreic Atacama Coast	Beta-226031	N/A	14C	390	40	Gayo et al 2015
Lluta 94	Exoreic Inland	Beta-336657	Plant material	14C	390	30	Gayo et al 2015
Millune	Exoreic Inland	Beta-336652	Seed	14C	390	30	Gayo et al 2015
Carrizalillo Chico	Endoreic Inland	TP7	Ceramic	TL	400	50	Troncoso & Pavlovic 2013
Cardones-1	Exoreic Inland	UGAMS-2952	Charcoal	14C	410	30	Gayo et al 2015
Caleta Vitor 4	Exoreic Atacama Coast	UGAMS-10519	Plant material	14C	420	20	Gayo et al 2015
Lauca 2	Exoreic Inland	UCIAMS-123258	Charcoal	14C	425	25	Gayo et al 2015
Rosario 2	Exoreic Inland	Beta-101496	Charcoal	14C	430	80	Gayo et al 2015
Pampa El Muerto 3	Exoreic Inland	UGAMS-3041	Charcoal	14C	430	25	Gayo et al 2015
Curiyuni Alero 8	Exoreic Inland	UCIAMS-123151	Charcoal	14C	430	20	Gayo et al 2015
Zapahuira Colqas	Exoreic Inland	UA-2912	Plant material	14C	435	105	Gayo et al 2015
Millune	Exoreic Inland	Beta-336653	Charred material	14C	440	30	Gayo et al 2015
Campamento Pan de Azucar 2	Endoreic Inland	Beta-150708	Charcoal	14C	450	40	Gayo et al 2015
Azapa 140	Exoreic Inland	Beta-78627	Camelid fiber textile	14C	450	50	Gayo et al 2015
Millune	Exoreic Inland	Beta-180800	Charcoal	14C	450	60	Gayo et al 2015
Lluta 21	Exoreic Inland	Beta-294875	Charcoal	14C	450	30	Gayo et al 2015
Dupont-1	Endoreic Inland	IVIC-171	Camelid fiber textile	14C	460	100	Gayo et al 2015
Zapahuira Gentilar	Exoreic Inland	Beta-201823	Plant material	14C	460	60	Gayo et al 2015
Carrizalillo Chico	Endoreic Inland	TP8	Ceramic	TL	470	100	Troncoso & Pavlovic 2013
Zapahuira Kancha	Exoreic Inland	Beta-200946	Charcoal	14C	470	50	Gayo et al 2015
Lluta 13	Exoreic Inland	Beta-234464	Charcoal	14C	470	40	Gayo et al 2015
Carrizalillo Chico	Endoreic Inland	TP9	Ceramic	TL	480	60	Troncoso & Pavlovic 2013
SBa-119	Endoreic Inland	Beta-7319	Charcoal	14C	480	50	Gayo et al 2015
Chajpa	Exoreic Inland	N/A	Charcoal	14C	480	60	Gayo et al 2015
Azapa 71	Exoreic Inland	Beta-78963	Camelid fiber textile	14C	490	60	Gayo et al 2015
Millune	Exoreic Inland	Beta-336651	Maize	14C	490	30	Gayo et al 2015
Tarapaca Viejo	Endoreic Inland	UCIAMS-58816	Maize	14C	495	15	Gayo et al 2015
Carrizalillo Chico	Endoreic Inland	TP10	Ceramic	TL	500	90	Troncoso & Pavlovic 2013
Azapa 140	Exoreic Inland	Beta-78967	Camelid fiber textile	14C	500	60	Gayo et al 2015
Cabra Atada	Endoreic Inland	TP11	Ceramic	TL	510	50	Troncoso & Pavlovic 2013
Abra	Endoreic Inland	Beta-113506	Charcoal	14C	510	70	Gayo et al 2015
Ancopachane	Exoreic Inland	N/A	Charcoal	14C	520	70	Gayo et al 2015
Sabaipugro Aldea	Exoreic Inland	I-5612	Charcoal	14C	525	90	Gayo et al 2015
Playa Miller 9	Exoreic Atacama Coast	Beta-78637	Camelid fiber textile	14C	530	60	Gayo et al 2015
Caleta Vitor 6	Exoreic Atacama Coast	UGAMS-10522	Maize	14C	530	25	Gayo et al 2015
Azapa 140	Exoreic Inland	Beta-78631	Camelid fiber textile	14C	530	50	Gayo et al 2015
Lauca 2	Exoreic Inland	UCIAMS-123257	Charcoal	14C	535	20	Gayo et al 2015
Zapahuira Chullpas	Exoreic Inland	UA-2910	Plant material	14C	535	95	Gayo et al 2015
Pica 8	Endoreic Inland	UCIAMS-134392	Bird tissue	14C	540	20	Gayo et al 2015
Sba-518 E-25/P1/4	Endoreic Inland	Beta-189483	Charcoal	14C	550	60	Gayo et al 2015
Camarones 9	Exoreic Atacama Coast	Beta-226518	Wood	14C	550	40	Gayo et al 2015
Chacarilla 15	Endoreic Inland	UCIAMS-77757	Charcoal	14C	560	35	Gayo et al 2015
Azapa 140	Exoreic Inland	Beta-78628	Camelid fiber textile	14C	560	50	Gayo et al 2015
Chusmisa	Endoreic Inland	Beta-220920	Charred material	14C	570	50	Gayo et al 2015
Camarones 9	Exoreic Atacama Coast	I-14094	Camelid fiber textile	14C	570	80	Gayo et al 2015
Lluta 13	Exoreic Inland	UGAMS-2954	Charred corn raquis	14C	570	30	Gayo et al 2015
Lluta 13	Exoreic Inland	UGAMS-2955	Maize	14C	570	30	Gayo et al 2015
Azapa 141	Exoreic Inland	I-13779	Human soft tissue	14C	570	80	Gayo et al 2015
Azapa 8	Exoreic Inland	UCLA-1294C	Vegetal fiber material	14C	580	80	Gayo et al 2015
Lipiche alero 1	Exoreic Inland	UCIAMS-123252	Charcoal	14C	585	15	Gayo et al 2015
Tantalcollo II	Exoreic Inland	Beta-200949	Charcoal	14C	590	70	Gayo et al 2015
Lluta 19	Exoreic Inland	Beta-294874	Charcoal	14C	590	30	Gayo et al 2015
Lluta 19	Exoreic Inland	Beta-336649	Plant material	14C	590	30	Gayo et al 2015
Pabellon de Pica 1E1U	Endoreic Atacama Coast	Beta-256617	Maize	14C	600	50	Gayo et al 2015
Cobija 24	Endoreic Atacama Coast	Beta-247640	N/A	14C	600	40	Gayo et al 2015
El Abra	Endoreic Inland	Beta-184055	Charcoal	14C	600	40	Gayo et al 2015
Caleta Vitor 4	Exoreic Atacama Coast	UGAMS-10517	Plant material	14C	610	25	Gayo et al 2015
Azapa 8	Exoreic Inland	UCLA-1294E	Vegetal fiber material	14C	610	60	Gayo et al 2015
Tarapaca Viejo	Endoreic Inland	AA-82248	Maize	14C	618	39	Gayo et al 2015
Catarpe 1	Endoreic Inland	Beta-293923	Human bone	14C	620	30	Gayo et al 2015
Cardones-1	Exoreic Inland	UGAMS-2951	Charcoal	14C	620	30	Gayo et al 2015
Lluta 94	Exoreic Inland	Beta-336655	Seed	14C	620	30	Gayo et al 2015
Pta. Guanillo: 21º58's 70º11'W	Endoreic Atacama Coast	Pa-2264	Yarn	14C	630	40	Gayo et al 2015
Chacarilla 15	Endoreic Inland	UCIAMS-77758	Charcoal	14C	630	35	Gayo et al 2015
Camarones 9	Exoreic Atacama Coast	I-14095	Camelid fiber textile	14C	630	80	Gayo et al 2015
Caleta Vitor 4	Exoreic Atacama Coast	UGAMS-10518	Maize	14C	630	30	Gayo et al 2015
Zapahuira Kancha	Exoreic Inland	Beta-189246	Charcoal	14C	630	50	Gayo et al 2015
Lluta 94	Exoreic Inland	Beta-336654	Maize	14C	630	30	Gayo et al 2015
La Puerta	Endoreic Inland	TP80	Ceramic	TL	640	150	Troncoso & Pavlovic 2013
Cobija 1 Norte	Endoreic Atacama Coast	Beta-226035	N/A	14C	640	40	Gayo et al 2015
El Abra	Endoreic Inland	Beta-147523	Charcoal	14C	640	40	Gayo et al 2015
Playa Miller 9	Exoreic Atacama Coast	Beta-78635	Camelid fiber textile	14C	640	50	Gayo et al 2015
Lluta 19	Exoreic Inland	Beta-294873	Charcoal	14C	640	30	Gayo et al 2015
Quile Kallanka	Exoreic Inland	Beta-202378	Wood	14C	640	50	Gayo et al 2015
El Abra	Endoreic Inland	Beta-239855	Charcoal	14C	650	40	Gayo et al 2015
Pica 8	Endoreic Inland	UCIAMS-134393	Feather	14C	650	20	Gayo et al 2015
Azapa 71	Exoreic Inland	Beta-78953	Camelid fiber textile	14C	650	60	Gayo et al 2015
Toconao Oriente	Endoreic Inland	X14985A	Human bone	14C	653	43	Gayo et al 2015
Lipiche alero 1	Exoreic Inland	UCIAMS-123250	Charcoal	14C	655	15	Gayo et al 2015
Caleta Vitor 6	Exoreic Atacama Coast	UGAMS-10523	Maize	14C	660	25	Gayo et al 2015
Azapa 71	Exoreic Inland	Beta-78960	Camelid fiber textile	14C	660	70	Gayo et al 2015
Zapahuira Chullpas	Exoreic Inland	UA-2911	Plant material	14C	660	60	Gayo et al 2015
Tarapaca Viejo	Endoreic Inland	AA-82247	Guinea pig fur	14C	662	38	Gayo et al 2015
Quebrada Chipana	Endoreic Inland	UCIAMS-145002	Marine shell	14C	665	30	Gayo et al 2015
Azapa 140	Exoreic Inland	Beta-78630	Camelid fiber textile	14C	670	60	Gayo et al 2015
Azapa 71	Exoreic Inland	Beta-78955	Camelid fiber textile	14C	670	50	Gayo et al 2015
La Puerta	Endoreic Inland	TP81	Ceramic	TL	680	100	Troncoso & Pavlovic 2013
SBa-41 R-11	Endoreic Inland	Beta-86758	Charcoal	14C	680	70	Gayo et al 2015
Camarones Sur	Exoreic Atacama Coast	I-5610	Charcoal	14C	680	90	Gayo et al 2015
Azapa 71	Exoreic Inland	Beta-78957	Camelid fiber textile	14C	680	60	Gayo et al 2015
Lluta 94	Exoreic Inland	Beta-294876	Charcoal	14C	680	30	Gayo et al 2015
Lauca 2	Exoreic Inland	UCIAMS-123259	Charcoal	14C	680	20	Gayo et al 2015
Azapa 8	Exoreic Inland	UCLA-1294A	Vegetal fiber material	14C	680	80	Gayo et al 2015
Catarpe 1	Endoreic Inland	X-14964A	Human bone	14C	689	43	Gayo et al 2015
Cobija 1 Norte	Endoreic Atacama Coast	Beta-226036	N/A	14C	690	40	Gayo et al 2015
Quebrada Ancha 30	Endoreic Inland	Beta-314504	Charred material	14C	690	30	Gayo et al 2015
La Capilla 4	Exoreic Atacama Coast	GaK-8779	Charcoal	14C	690	100	Gayo et al 2015
Azapa 140	Exoreic Inland	Beta-78632	Camelid fiber textile	14C	690	60	Gayo et al 2015
Azapa 140	Exoreic Inland	Beta-78968	Camelid fiber textile	14C	690	60	Gayo et al 2015
Azapa 71	Exoreic Inland	I-11641	N/A	14C	695	75	Gayo et al 2015
RAnL-337-1	Endoreic Inland	I-5399	Wood	14C	700	90	Gayo et al 2015
Camina 1	Endoreic Inland	Beta-210441	Charcoal	14C	710	70	Gayo et al 2015
Quitor 6	Endoreic Inland	Beta-11207	Wood	14C	710	70	Gayo et al 2015
Quillagua 1	Endoreic Inland	TK-172	Wood	14C	710	70	Gayo et al 2015
Camarones 8	Exoreic Atacama Coast	Beta-226517	Wood	14C	710	70	Gayo et al 2015
Sabaipugro	Exoreic Inland	I-5611	Charcoal	14C	715	90	Gayo et al 2015
Azapa 6	Exoreic Inland	I-11622	Sweet potatoe & sorona	14C	715	130	Gayo et al 2015
SBa-103 E-1 NE	Endoreic Inland	ISGS-2732	Charcoal	14C	720	70	Gayo et al 2015
Sba-518 E-9/1/2	Endoreic Inland	Beta-189482	Charcoal	14C	720	60	Gayo et al 2015
Playa Miller 9	Exoreic Atacama Coast	Beta-78634	Camelid fiber textile	14C	720	60	Gayo et al 2015
SBa-103 E-31	Endoreic Inland	ISGS-2733	Charcoal	14C	730	70	Gayo et al 2015
Azapa 140	Exoreic Inland	Beta-78629	Camelid fiber textile	14C	740	70	Gayo et al 2015
Azapa 140	Exoreic Inland	Beta-78964	Camelid fiber textile	14C	740	60	Gayo et al 2015
Azapa 140	Exoreic Inland	Beta-78966	Camelid fiber textile	14C	740	60	Gayo et al 2015
Chomache 1E1U	Endoreic Atacama Coast	Beta-256619	Plant material	14C	750	40	Gayo et al 2015
Catarpe 2	Endoreic Inland	Beta-251750	Human bone	14C	750	40	Gayo et al 2015
Catarpe 1	Endoreic Inland	X-14963A	Human bone	14C	752	43	Gayo et al 2015
Azapa 71	Exoreic Inland	I-11185	Human soft tissue	14C	760	75	Gayo et al 2015
Azapa 71	Exoreic Inland	I-11621	Plant material	14C	765	75	Gayo et al 2015
Sba-518 E-38/1/1R2	Endoreic Inland	Beta-189484	Charcoal	14C	770	60	Gayo et al 2015
Challacollo 1	Endoreic Inland	UCIAMS-126284	Charcoal	14C	770	20	Gayo et al 2015
Catarpe 2	Endoreic Inland	Beta-251749	Human bone	14C	770	40	Gayo et al 2015
Solor 4	Endoreic Inland	Gr-N-4125	Wood	14C	770	65	Gayo et al 2015
Nama 1	Exoreic Inland	Beta-210437	Charred material	14C	770	70	Gayo et al 2015
Playa Miller 9	Exoreic Atacama Coast	I-10861	Plant material	14C	775	80	Gayo et al 2015
La Puerta	Endoreic Inland	TP82	Ceramic	TL	780	60	Troncoso & Pavlovic 2013
Jarizmalla	Exoreic Inland	Beta-200948	Charcoal	14C	780	70	Gayo et al 2015
Azapa 71	Exoreic Inland	I-11447	Human soft tissue	14C	780	75	Gayo et al 2015
La Puerta	Endoreic Inland	TP83	Ceramic	TL	790	50	Troncoso & Pavlovic 2013
Tangani 1	Exoreic Inland	BETA-259168	Charcoal	14C	790	40	Gayo et al 2015
Azapa 140	Exoreic Inland	I-12350	Organic material	14C	790	80	Gayo et al 2015
La Puerta	Endoreic Inland	TP88	N/A	14C	800	50	Troncoso & Pavlovic 2013
Jamajuga	Endoreic Inland	Beta-220921	Charred material	14C	800	50	Gayo et al 2015
Azapa 71	Exoreic Inland	Beta-78952	Camelid fiber textile	14C	800	70	Gayo et al 2015
Azapa 140	Exoreic Inland	Beta-78965	Camelid fiber textile	14C	800	70	Gayo et al 2015
Los Verdes 1E1U	Endoreic Atacama Coast	Beta-256616	Wood	14C	810	50	Gayo et al 2015
Pica 8	Endoreic Inland	Beta-220924	Human bone	14C	810	40	Gayo et al 2015
Azapa 8	Exoreic Inland	UCLA-1294D	Camelid fiber textile	14C	810	80	Gayo et al 2015
Azapa 71	Exoreic Inland	Beta-80634	Camelid fiber textile	14C	810	70	Gayo et al 2015
Azapa 140	Exoreic Inland	Beta-78969	Camelid fiber textile	14C	820	60	Gayo et al 2015
Azapa 71	Exoreic Inland	Beta-78959	Camelid fiber textile	14C	820	40	Gayo et al 2015
Lipiche alero 1	Exoreic Inland	UCIAMS-123251	Charcoal	14C	820	15	Gayo et al 2015
Cobija 24	Endoreic Atacama Coast	Beta-247641	N/A	14C	830	40	Gayo et al 2015
Quebrada de Tasma 48	Endoreic Inland	Beta-314505	Charred material	14C	830	30	Gayo et al 2015
Cerro Turquesa	Endoreic Inland	Beta-287255	Wood	14C	830	40	Gayo et al 2015
Azapa 71	Exoreic Inland	Beta-77222	Camelid fiber textile	14C	830	50	Gayo et al 2015
Cardones-1	Exoreic Inland	Beta-246700	Charcoal	14C	830	40	Gayo et al 2015
Punta Morada Sitio 02 Ta 008	Endoreic Atacama Coast	Beta-175455	Marine shell	14C	840	40	Gayo et al 2015
Lipiche alero 1	Exoreic Inland	UCIAMS-123155	Charcoal	14C	845	20	Gayo et al 2015
La Puerta	Endoreic Inland	TP84	Ceramic	TL	850	100	Troncoso & Pavlovic 2013
Caserones 1	Endoreic Inland	GaK-3821	Human hair	14C	850	80	Gayo et al 2015
Azapa 71	Exoreic Inland	Beta-78961	Camelid fiber textile	14C	850	60	Gayo et al 2015
Azapa 71	Exoreic Inland	Beta-78954	Camelid fiber textile	14C	850	50	Gayo et al 2015
Azapa 71	Exoreic Inland	Beta-78958	Camelid fiber textile	14C	850	50	Gayo et al 2015
Azapa 71	Exoreic Inland	Beta-77223	Camelid fiber textile	14C	850	40	Gayo et al 2015
Tiliviche 1-B	Exoreic Inland	GX-30781	Maize	14C	850	30	Gayo et al 2015
Quebrada Seca	Endoreic Inland	TP89	N/A	14C	860	60	Troncoso & Pavlovic 2013
La Puerta	Endoreic Inland	TP85	Ceramic	TL	860	90	Troncoso & Pavlovic 2013
La Puerta	Endoreic Inland	TP86	Ceramic	TL	860	120	Troncoso & Pavlovic 2013
Azapa 71	Exoreic Inland	Beta-78962	Camelid fiber textile	14C	860	70	Gayo et al 2015
Lauca 2	Exoreic Inland	UCIAMS-123283	Charcoal	14C	860	15	Gayo et al 2015
Toconao Oriente	Endoreic Inland	X14984A	Human bone	14C	867	44	Gayo et al 2015
Cobija 23	Endoreic Atacama Coast	Beta-3119	Charcoal	14C	870	90	Gayo et al 2015
Turi	Endoreic Inland	Beta-9527	Wood	14C	870	50	Gayo et al 2015
Azapa 141	Exoreic Inland	I-14093	Human soft tissue	14C	870	80	Gayo et al 2015
Lipiche alero 1	Exoreic Inland	UCIAMS-123153	Charcoal	14C	875	25	Gayo et al 2015
Cobija 23	Endoreic Atacama Coast	Beta-3120	Charcoal	14C	880	60	Gayo et al 2015
Pisagua N	Exoreic Atacama Coast	Beta-201435	Charcoal	14C	880	40	Gayo et al 2015
Pisagua N	Exoreic Atacama Coast	Beta-201435	Charred material	14C	880	40	Gayo et al 2015
Pisagua	Exoreic Atacama Coast	Beta-210435	Charred material	14C	880	40	Gayo et al 2015
Azapa 140	Exoreic Inland	Beta-78633	Camelid fiber textile	14C	880	70	Gayo et al 2015
Lauca 2	Exoreic Inland	UCIAMS-123260	Charcoal	14C	880	15	Gayo et al 2015
Patache Q	Endoreic Atacama Coast	GX-22437	Camelid fiber	14C	885	70	Gayo et al 2015
Chuquicamata	Endoreic Inland	POZ37209	Wood shaving	14C	890	30	Gayo et al 2015
Chuquicamata	Endoreic Inland	POZ-37207	Wood shaving	14C	895	30	Gayo et al 2015
Puntilla Blanca	Endoreic Inland	TP90	N/A	14C	900	50	Troncoso & Pavlovic 2013
Pica 8	Endoreic Inland	Beta-220923	Human bone	14C	900	40	Gayo et al 2015
Quitor 9	Endoreic Inland	I-1205	Wood	14C	900	80	Gayo et al 2015
Lluta 43	Exoreic Inland	Beta-298861	Animal soft tissue	14C	900	30	Gayo et al 2015
Pukarqollu	Endoreic Inland	Beta-227581	Charred material	14C	910	60	Gayo et al 2015
Cerro Turquesa	Endoreic Inland	Beta-217771	Wood	14C	910	50	Gayo et al 2015
Azapa 6	Exoreic Inland	I-11625	Coca leaves	14C	910	145	Gayo et al 2015
Camina 1	Endoreic Inland	Beta-210442	Charred material	14C	920	40	Gayo et al 2015
Yaye-1	Endoreic Inland	Beta-251755	Human bone	14C	920	40	Gayo et al 2015
Playa Miller 9	Exoreic Atacama Coast	Beta-78636	Camelid fiber textile	14C	920	50	Gayo et al 2015
Tiliviche 1-B	Exoreic Inland	AA-56416	Maize	14C	920	32	Gayo et al 2015
Chacance 2	Endoreic Atacama Coast	GX-23648	Human soft tissue	14C	930	50	Gayo et al 2015
Mamilla 7	Endoreic Atacama Coast	Beta-255686	Wood	14C	930	50	Gayo et al 2015
Pica 8	Endoreic Inland	IVIC-173	Camelid fiber textile	14C	930	90	Gayo et al 2015
Cerro Turquesa	Endoreic Inland	Beta-217772	Charcoal	14C	930	40	Gayo et al 2015
Pukarqollu	Endoreic Inland	Beta-227580	Charred material	14C	930	40	Gayo et al 2015
Quebrada Maní 12c	Endoreic Inland	UCIAMS-145154	Plant material	14C	930	20	Gayo et al 2015
Azapa 141	Exoreic Inland	I-13780	Charcoal	14C	930	80	Gayo et al 2015
Pica 8	Endoreic Inland	IVIC-792	Camelid fiber textile	14C	950	70	Gayo et al 2015
Chacarilla 15	Endoreic Inland	UCIAMS-97247	Charcoal	14C	955	15	Gayo et al 2015
Quitor 1	Endoreic Inland	X14968A	Human bone	14C	956	44	Gayo et al 2015
SBa-153	Endoreic Inland	I-12401	Charcoal	14C	960	80	Gayo et al 2015
Tchecar Tumulo Sur	Endoreic Inland	Beta-263474	Human bone	14C	960	40	Gayo et al 2015
Lauca 2	Exoreic Inland	UCIAMS-123261	Charcoal	14C	965	15	Gayo et al 2015
Cerros Pintados 3	Endoreic Inland	Beta-150710	Maize	14C	970	50	Gayo et al 2015
Solor 4	Endoreic Inland	N-4124	Wood	14C	970	75	Gayo et al 2015
Nama 1	Exoreic Inland	Beta-201436	Charred material	14C	970	60	Gayo et al 2015
Quebrada Mani	Endoreic Inland	UCIAMS-84356	Prosopis sp leaves	14C	975	15	Gayo et al 2015
Quebrada Mani	Endoreic Inland	UCIAMS-84739	Plant material	14C	980	20	Gayo et al 2015
Quebrada Mani	Endoreic Inland	UCIAMS-108143	Plant material	14C	980	15	Gayo et al 2015
Quebrada Maní Canales	Endoreic Inland	UCIAMS-108143	Wood	14C	980	15	Gayo et al 2015
Azapa 140	Exoreic Inland	I-12336	Human soft tissue	14C	980	80	Gayo et al 2015
Azapa 140	Exoreic Inland	I-12349	Human soft tissue	14C	980	80	Gayo et al 2015
Azapa 141	Exoreic Inland	I-14092	Human soft tissue	14C	980	80	Gayo et al 2015
Quebrada Mani	Endoreic Inland	UCIAMS-84336	Maize	14C	985	15	Gayo et al 2015
Solcor Plaza	Endoreic Inland	X14978A	Human bone	14C	987	44	Gayo et al 2015
Coyo 3	Endoreic Inland	Beta-44674	Camelid fiber textile	14C	990	50	Gayo et al 2015
Quebrada Mani	Endoreic Inland	UCIAMS-108144	Plant material	14C	990	15	Gayo et al 2015
Quebrada Mani	Endoreic Inland	UCIAMS-84341	Plant material	14C	990	15	Gayo et al 2015
Quebrada Maní Canales	Endoreic Inland	UCIAMS-108144	Wood	14C	990	15	Gayo et al 2015
Caleta Vitor 3	Exoreic Atacama Coast	S-ANU33420	Bone	14C	990	39	Gayo et al 2015
Cardones-1	Exoreic Inland	UGAMS-2950	Charcoal	14C	990	30	Gayo et al 2015
Azapa 6	Exoreic Inland	Beta-226815	Human hair	14C	990	40	Gayo et al 2015
Quebrada Mani 1	Endoreic Inland	UGAMS-4565	Prosopis sp seed	14C	1000	25	Gayo et al 2015
Caleta Vitor 6	Exoreic Atacama Coast	S-ANU30233	Bone	14C	1000	25	Gayo et al 2015
Playa Miller 8	Exoreic Atacama Coast	Beta-226827	Human hair	14C	1000	40	Gayo et al 2015
Azapa 140	Exoreic Inland	I-12337	Human soft tissue	14C	1000	80	Gayo et al 2015
Azapa 71	Exoreic Inland	I-11446	Human soft tissue	14C	1000	75	Gayo et al 2015
Azapa 71	Exoreic Inland	Beta-78956	Camelid fiber textile	14C	1010	80	Gayo et al 2015
Pta. Guanillo: 21º58's 70º11'W	Endoreic Atacama Coast	Pa-2265	Protothaca thaca	14C	1027	40	Gayo et al 2015
Coyo 3	Endoreic Inland	Beta-44673	Camelid fiber textile	14C	1030	80	Gayo et al 2015
Quitor 6	Endoreic Inland	Beta-11208	Camelid fiber textile	14C	1030	70	Gayo et al 2015
Solcor 3 Nro 41	Endoreic Inland	N/A	Charcoal	14C	1030	120	Gayo et al 2015
Catarpe 2	Endoreic Inland	Beta-251748	Human bone	14C	1030	40	Gayo et al 2015
Challacollo 1	Endoreic Inland	UCIAMS-126283	Plant material	14C	1030	20	Gayo et al 2015
Coyo 3	Endoreic Inland	Beta-44675	Camelid fiber textile	14C	1040	70	Gayo et al 2015
Solcor 3 Nro 41	Endoreic Inland	N/A	Charcoal	14C	1040	50	Gayo et al 2015
Yaye-2	Endoreic Inland	Beta-251758	Human bone	14C	1040	40	Gayo et al 2015
Pica 8	Endoreic Inland	Beta-220922	Human bone	14C	1050	40	Gayo et al 2015
Quitor 6	Endoreic Inland	Beta-263467	Human bone	14C	1050	40	Gayo et al 2015
Camarones Sur	Exoreic Atacama Coast	GaK-8644	Charcoal	14C	1050	110	Gayo et al 2015
Playa Miller 9	Exoreic Atacama Coast	N/A	N/A	14C	1055	80	Gayo et al 2015
Playa Miller 9	Exoreic Atacama Coast	I-11624	Plant material	14C	1055	80	Gayo et al 2015
Casa Parroquial	Endoreic Inland	X-14961A	Human bone	14C	1067	44	Gayo et al 2015
Quitor 9	Endoreic Inland	X14976A	Human bone	14C	1068	44	Gayo et al 2015
Alero Toconce	Endoreic Inland	Beta-1991	Organic	14C	1070	60	Gayo et al 2015
Azapa 140	Exoreic Inland	I-12335	Human soft tissue	14C	1070	80	Gayo et al 2015
Solor Vilama 3	Endoreic Inland	X14982A	Human bone	14C	1076	45	Gayo et al 2015
Lluta 54	Exoreic Inland	Beta-226820	Camelid fiber textile	14C	1076	30	Gayo et al 2015
Alero Ojalar	Endoreic Inland	Beta-117559	Charcoal	14C	1080	80	Gayo et al 2015
Caserones 1	Endoreic Inland	Beta-220917	Charcoal	14C	1080	40	Gayo et al 2015
Solcor 3	Endoreic Inland	Beta-305869	Human bone	14C	1080	30	Gayo et al 2015
Playa Miller 4	Exoreic Atacama Coast	Beta-226823	Human hair	14C	1080	40	Gayo et al 2015
Catarpe 5	Endoreic Inland	X-14965A	Human bone	14C	1083	47	Gayo et al 2015
La Puerta	Endoreic Inland	TP87	N/A	14C	1090	50	Troncoso & Pavlovic 2013
Tchecar Tumulo Sur	Endoreic Inland	Beta-263473	Human bone	14C	1090	40	Gayo et al 2015
Azapa 11	Exoreic Inland	I-12335	Organic material	14C	1090	80	Gayo et al 2015
Azapa 140	Exoreic Inland	I-12351	Organic material	14C	1090	80	Gayo et al 2015
Cabra Atada	Endoreic Inland	TP91	N/A	14C	1100	50	Troncoso & Pavlovic 2013
Iglesia Colorada	Endoreic Inland	TP94	Ceramic	TL	1100	70	Troncoso & Pavlovic 2013
Solcor 3 Nro 41	Endoreic Inland	N/A	Charcoal	14C	1100	110	Gayo et al 2015
Yaye	Endoreic Inland	Beta-251756	Human bone	14C	1100	40	Gayo et al 2015
Coyo Oriental	Endoreic Inland	Beta-33854	Human soft tissue	14C	1100	70	Gayo et al 2015
Chuquicamata 2	Endoreic Inland	N/A	Charcoal	14C	1110	60	Gayo et al 2015
Playa Miller 4	Exoreic Atacama Coast	Beta-226825	Human hair	14C	1110	40	Gayo et al 2015
Casa Parroquial	Endoreic Inland	X-14962A	Human bone	14C	1113	44	Gayo et al 2015
Catarpe 5	Endoreic Inland	X-14966A	Human bone	14C	1123	44	Gayo et al 2015
Solor Vilama 3	Endoreic Inland	X14983A	Human bone	14C	1125	45	Gayo et al 2015
Caleta Huelen 43	Endoreic Atacama Coast	IVIC-791	Human soft tissue	14C	1130	80	Gayo et al 2015
Chacarilla 15	Endoreic Inland	UCIAMS-97248	Charcoal	14C	1135	15	Gayo et al 2015
Azapa 140	Exoreic Inland	I-12352	Organic material	14C	1140	80	Gayo et al 2015
Mejillones cementerio Koppers-1	Endoreic Atacama Coast	N/A	Human bone	14C	1150	70	Gayo et al 2015
Conanoxa	Exoreic Inland	IVIC-176	Charcoal	14C	1150	95	Gayo et al 2015
Coyo Oriental	Endoreic Inland	Beta-33857	Camelid fiber textile	14C	1155	80	Gayo et al 2015
Lauca 2	Exoreic Inland	UCIAMS-123262	Charcoal	14C	1155	15	Gayo et al 2015
Tarapaca 40	Endoreic Inland	Gak-2296	Algarrobo seed	14C	1160	90	Gayo et al 2015
Solcor 3	Endoreic Inland	Beta-305870	Human bone	14C	1160	30	Gayo et al 2015
Valle de Lluta Km 53	Exoreic Inland	Beta-226817	Human hair	14C	1160	40	Gayo et al 2015
Azapa 140	Exoreic Inland	I-12334	Organic material	14C	1160	80	Gayo et al 2015
Quitor 5	Endoreic Inland	X14971A	Human bone	14C	1164	44	Gayo et al 2015
Yaye-4	Endoreic Inland	Beta-251760	Human bone	14C	1170	40	Gayo et al 2015
Solcor 3 Tba 112	Endoreic Inland	Beta-32447	Human soft tissue	14C	1170	60	Gayo et al 2015
Caleta Vitor 2	Exoreic Atacama Coast	OZP080	Bone	14C	1170	30	Gayo et al 2015
Lauca 2	Exoreic Inland	UCIAMS-123256	Charcoal	14C	1170	15	Gayo et al 2015
Guatacondo 1	Endoreic Inland	IVIC-167	Maize	14C	1175	90	Gayo et al 2015
Caleta Vitor 2	Exoreic Atacama Coast	OZP075	Bone	14C	1175	25	Gayo et al 2015
Tulan	Endoreic Inland	HV-298	Charcoal	14C	1180	60	Gayo et al 2015
Alero El Suri	Endoreic Inland	Beta-129874	Charcoal	14C	1180	40	Gayo et al 2015
Yaye-3	Endoreic Inland	Beta-251759	Human bone	14C	1180	40	Gayo et al 2015
Quitor 6	Endoreic Inland	Beta-263469	Human bone	14C	1180	40	Gayo et al 2015
Canamo 3	Endoreic Atacama Coast	TK-101	Basketry	14C	1190	60	Gayo et al 2015
Chacarilla 15	Endoreic Inland	UCIAMS-123268	Dung	14C	1190	15	Gayo et al 2015
Tchecar Tumulo Sur	Endoreic Inland	Beta-293928	Human bone	14C	1190	30	Gayo et al 2015
Azapa 83	Exoreic Inland	GaK-5810	Charcoal	14C	1190	70	Gayo et al 2015
Azapa 140	Exoreic Inland	I-12348	Human soft tissue	14C	1190	80	Gayo et al 2015
Azapa 75	Exoreic Inland	I-13781	Human soft tissue	14C	1190	80	Gayo et al 2015
Tarapaca 13A	Endoreic Inland	GaK-3016	Plant material	14C	1200	110	Gayo et al 2015
Quebrada Mani	Endoreic Inland	UCIAMS-84355	Plant material	14C	1205	15	Gayo et al 2015
Alero Dona Marta	Endoreic Inland	Beta-144001	Charcoal	14C	1210	60	Gayo et al 2015
Catarpe 2	Endoreic Inland	Beta-251747	Human bone	14C	1220	40	Gayo et al 2015
Azapa 6	Exoreic Inland	GaK-5917	Camelid fiber textile	14C	1220	80	Gayo et al 2015
Iglesia Colorada	Endoreic Inland	TP95	Ceramic	TL	1230	90	Troncoso & Pavlovic 2013
Solcor 3 Nro 41	Endoreic Inland	N/A	Charcoal	14C	1230	95	Gayo et al 2015
Caserones 3	Endoreic Inland	GaK-3897	Organic	14C	1230	110	Gayo et al 2015
Lluta 13	Exoreic Inland	UCIAMS-145247	Cotton seed	14C	1235	15	Gayo et al 2015
Tchecar Tumulo Sur	Endoreic Inland	Beta-263475	Human bone	14C	1240	40	Gayo et al 2015
La Capilla 4	Exoreic Atacama Coast	GaK-8780	Bone	14C	1250	100	Gayo et al 2015
Caleta Vitor 2	Exoreic Atacama Coast	OZP074	Bone	14C	1255	25	Gayo et al 2015
Punta Brava	Endoreic Inland	TP96	Ceramic	TL	1260	50	Troncoso & Pavlovic 2013
Solcor 3 Nro 41	Endoreic Inland	N/A	Charcoal	14C	1270	90	Gayo et al 2015
Caserones 1	Endoreic Inland	CAMS-10320	Plant material	14C	1270	60	Gayo et al 2015
Lluta 13	Exoreic Inland	UCIAMS-145248	Charred maize	14C	1270	25	Gayo et al 2015
Solor Vilama 3	Endoreic Inland	Beta-293924	Human bone	14C	1280	30	Gayo et al 2015
Quitor 6	Endoreic Inland	Beta-263468	Human bone	14C	1290	40	Gayo et al 2015
Lluta 13	Exoreic Inland	UCIAMS-145245	Equisetum stem	14C	1290	20	Gayo et al 2015
Lluta 13	Exoreic Inland	UCIAMS-145244	Maize	14C	1290	20	Gayo et al 2015
Iglesia Colorada	Endoreic Inland	TP97	Ceramic	TL	1300	70	Troncoso & Pavlovic 2013
Yaye-2	Endoreic Inland	Beta-251757	Human bone	14C	1300	40	Gayo et al 2015
Lauca	Exoreic Inland	Beta-43018	Charcoal	14C	1300	80	Gayo et al 2015
Los Molinos	Endoreic Inland	TP98	Ceramic	TL	1310	70	Troncoso & Pavlovic 2013
Quebrada Cuestecilla	Endoreic Inland	TP99	Ceramic	TL	1310	70	Troncoso & Pavlovic 2013
Coyo Oriental	Endoreic Inland	Beta-33853	Human bone	14C	1310	70	Gayo et al 2015
Quitor 2	Endoreic Inland	Beta-251752	Human bone	14C	1310	40	Gayo et al 2015
Coyo Oriental	Endoreic Inland	Beta-33855	Human bone	14C	1310	80	Gayo et al 2015
Caleta Vitor 6	Exoreic Atacama Coast	OZP076	Bone	14C	1310	25	Gayo et al 2015
Iglesia Colorada	Endoreic Inland	TP100	Ceramic	TL	1315	70	Troncoso & Pavlovic 2013
Quebrada Cuestecilla	Endoreic Inland	TP101	Ceramic	TL	1320	40	Troncoso & Pavlovic 2013
Chomache 1E1U1U	Endoreic Atacama Coast	Beta-256618	Charred material	14C	1320	40	Gayo et al 2015
Coyo Oriental	Endoreic Inland	Beta-33856	Camelid fiber textile	14C	1320	60	Gayo et al 2015
Quitor 5	Endoreic Inland	X14973A	Human bone	14C	1338	45	Gayo et al 2015
Chuquicamata	Endoreic Inland	LJ-3949	Camelid fiber textile	14C	1350	80	Gayo et al 2015
Los Molinos	Endoreic Inland	TP102	Ceramic	TL	1360	65	Troncoso & Pavlovic 2013
Los Fósiles	Endoreic Inland	TP103	Ceramic	TL	1360	50	Troncoso & Pavlovic 2013
San Lorenzo	Exoreic Inland	I-11623	Human soft tissue	14C	1360	80	Gayo et al 2015
Gualaguala 04	Endoreic Atacama Coast	Beta-322286	Plant fragments	14C	1370	30	Gayo et al 2015
Quebrada Ancha 13	Endoreic Inland	Beta-314503	Charred material	14C	1370	30	Gayo et al 2015
Tarapaca 40	Endoreic Inland	Beta-63793	Tunica fiber	14C	1370	60	Gayo et al 2015
El Torín	Endoreic Inland	TP5	N/A	14C	1380	80	Troncoso & Pavlovic 2013
Solcor 3 Nro 41	Endoreic Inland	N/A	Charcoal	14C	1380	60	Gayo et al 2015
Los Fósiles	Endoreic Inland	TP104	Ceramic	TL	1385	50	Troncoso & Pavlovic 2013
Azapa 83	Exoreic Inland	GaK-5809	Charcoal	14C	1390	110	Gayo et al 2015
Azapa 75	Exoreic Inland	I-13782	Human soft tissue	14C	1390	80	Gayo et al 2015
Los Fósiles	Endoreic Inland	TP105	Ceramic	TL	1395	55	Troncoso & Pavlovic 2013
Chuquicamata	Endoreic Inland	LJ-3847	Human soft tissue	14C	1400	40	Gayo et al 2015
Challacollo 1	Endoreic Inland	UCIAMS-1126293	Marine shell	14C	1400	20	Gayo et al 2015
Hombre de Cobre	Endoreic Inland	LJ-3947	N/A	14C	1400	40	Gayo et al 2015
Lauca 2	Exoreic Inland	UCIAMS-123254	Charcoal	14C	1400	15	Gayo et al 2015
Lluta 13	Exoreic Inland	UGAMS-2958	Maize	14C	1410	30	Gayo et al 2015
Chacarilla 15	Endoreic Inland	UCIAMS-97417	Charcoal	14C	1415	20	Gayo et al 2015
Caleta Huelen 2	Endoreic Atacama Coast	Hv-556	Charcoal	14C	1425	80	Gayo et al 2015
Coyo Oriental	Endoreic Inland	Beta-33858	Camelid fiber textile	14C	1430	60	Gayo et al 2015
Alero La Capilla	Endoreic Inland	Beta-117562	Charcoal	14C	1430	60	Gayo et al 2015
Sequitor Alambrado	Endoreic Inland	Beta-263471	Human bone	14C	1430	40	Gayo et al 2015
Isluga-2	Endoreic Inland	Gak-8372	Animal bone	14C	1440	50	Gayo et al 2015
Campamento Soronal 3	Endoreic Inland	Beta-150711	Charcoal	14C	1450	40	Gayo et al 2015
Quitor 8	Endoreic Inland	Beta-251754	Human bone	14C	1450	40	Gayo et al 2015
Pircas 1	Exoreic Inland	Beta-5461	Dung	14C	1450	90	Gayo et al 2015
Lluta 13	Exoreic Inland	UGAMS-2956	Maize	14C	1450	30	Gayo et al 2015
Carrizalillo Chico	Endoreic Inland	TP6	N/A	14C	1470	70	Troncoso & Pavlovic 2013
Solcor 3 Nro 41	Endoreic Inland	N/A	Charcoal	14C	1470	80	Gayo et al 2015
Solcor 3 Nro 38	Endoreic Inland	N/A	Charcoal	14C	1470	60	Gayo et al 2015
Quebrada de Tasma 349	Endoreic Inland	Beta-314507	Charred material	14C	1470	30	Gayo et al 2015
Quitor 6	Endoreic Inland	Beta-263470	Human bone	14C	1490	40	Gayo et al 2015
Quitor 2	Endoreic Inland	X14969A	Human bone	14C	1491	46	Gayo et al 2015
Chacarilla 15	Endoreic Inland	UCIAMS-123264	Dung	14C	1495	20	Gayo et al 2015
Chuquicamata	Endoreic Inland	POZ37208	Wood shaving	14C	1505	30	Gayo et al 2015
Quitor 8	Endoreic Inland	Beta-251753	Human bone	14C	1510	40	Gayo et al 2015
Quitor 5	Endoreic Inland	X14972A	Human bone	14C	1511	46	Gayo et al 2015
Punta Blanca 1E2U	Endoreic Atacama Coast	Beta-256623	Charred material	14C	1520	40	Gayo et al 2015
Quitor 2	Endoreic Inland	Beta-251751	Human bone	14C	1520	40	Gayo et al 2015
Quebrada Mani	Endoreic Inland	UCIAMS-84343	Plant material	14C	1525	15	Gayo et al 2015
Playa Miller 9	Exoreic Atacama Coast	Beta-78638	Camelid fiber textile	14C	1530	60	Gayo et al 2015
Solcor Plaza	Endoreic Inland	X14977A	Human bone	14C	1535	45	Gayo et al 2015
Quebrada Mani	Endoreic Inland	UCIAMS-84342	Plant material	14C	1535	15	Gayo et al 2015
Chacarilla 15	Endoreic Inland	UCIAMS-123266	Dung	14C	1540	15	Gayo et al 2015
Chacarilla 15	Endoreic Inland	UCIAMS-123271	Dung	14C	1545	15	Gayo et al 2015
Hakenasa	Exoreic Inland	Beta-187525	Charcoal	14C	1550	60	Gayo et al 2015
Lauca 2	Exoreic Inland	UCIAMS-123255	Charcoal	14C	1555	20	Gayo et al 2015
Caleta Vitor 6	Exoreic Atacama Coast	S-ANU30232	Bone	14C	1560	77	Gayo et al 2015
Azapa 6	Exoreic Inland	GaK-5816	Wood	14C	1570	65	Gayo et al 2015
Quebrada Maní 4	Endoreic Inland	UCIAMS-97258	Charcoal	14C	1575	15	Gayo et al 2015
Chacarilla 15	Endoreic Inland	UCIAMS-123270	Dung	14C	1575	15	Gayo et al 2015
Caserones 1	Endoreic Inland	CAMS-9372	Camelid fiber	14C	1580	40	Gayo et al 2015
Confluencia	Endoreic Inland	Beta-30025	Charcoal	14C	1580	60	Gayo et al 2015
Tarapaca 40	Endoreic Inland	Beta-355779	Teeth/bones	14C	1580	30	Gayo et al 2015
Tarapaca 40	Endoreic Inland	Beta-63794	Tunica fiber	14C	1580	70	Gayo et al 2015
Punta Blanca 1E2U	Endoreic Atacama Coast	Beta-256620	Charred material	14C	1590	40	Gayo et al 2015
Quebrada Maní 4	Endoreic Inland	UCIAMS-108147	Plant material	14C	1590	20	Gayo et al 2015
Tarapaca 10	Endoreic Inland	WSU-950	Wood	14C	1590	140	Gayo et al 2015
Cobija 10	Endoreic Atacama Coast	Beta-3112	Cacti wood	14C	1600	100	Gayo et al 2015
Sequitor Alambrado	Endoreic Inland	Beta-251745	Human bone	14C	1600	40	Gayo et al 2015
Quebrada Maní 4	Endoreic Inland	UCIAMS-108149	Charcoal	14C	1605	15	Gayo et al 2015
Quebrada Maní 4	Endoreic Inland	UCIAMS-108150	Charcoal	14C	1605	15	Gayo et al 2015
Caserones 9	Endoreic Inland	UCLA-1834B	Plant material	14C	1610	80	Gayo et al 2015
Tarapaca 40	Endoreic Inland	Beta-355777	Teeth/bones	14C	1610	30	Gayo et al 2015
Solor 3	Endoreic Inland	X14980A	Human bone	14C	1616	46	Gayo et al 2015
Quitor 5	Endoreic Inland	X14974A	Human bone	14C	1623	46	Gayo et al 2015
Patache A	Endoreic Atacama Coast	GX-22428	Charcoal	14C	1625	70	Gayo et al 2015
Puripica-7	Endoreic Inland	Beta-85224	Charcoal	14C	1630	80	Gayo et al 2015
Chacarilla 14	Endoreic Inland	UCIAMS-77756	Charcoal	14C	1630	35	Gayo et al 2015
Quebrada de Tasma 288	Endoreic Inland	Beta-314506	Charred material	14C	1630	30	Gayo et al 2015
Tarapaca 40	Endoreic Inland	CAMS-7608	Tunica fiber	14C	1630	70	Gayo et al 2015
Pircas 269	Endoreic Inland	Beta-294702	Wood	14C	1630	30	Gayo et al 2015
Azapa 75	Exoreic Inland	N/A	Human hair	14C	1635	80	Gayo et al 2015
Puripica 31	Endoreic Inland	Beta-72742	Charcoal	14C	1640	70	Gayo et al 2015
Pircas 198	Endoreic Inland	Beta-294699	Wood	14C	1640	30	Gayo et al 2015
Q. El Durazno	Endorreic Inland	TP12	N/A	14C	1640	90	Troncoso & Pavlovic 2013
Quebrada Maní 4	Endoreic Inland	UCIAMS-108145	Plant material	14C	1650	20	Gayo et al 2015
Quebrada Mani	Endoreic Inland	UCIAMS-84737	Plant material	14C	1650	20	Gayo et al 2015
Chuquicamata	Endoreic Inland	LJ-3948	Camelid fiber	14C	1659	130	Gayo et al 2015
Tarapaca 40	Endoreic Inland	GaK-2206	Algarrobo seed	14C	1660	90	Gayo et al 2015
Larache Callejon Real	Endoreic Inland	X14967A	Human bone	14C	1667	45	Gayo et al 2015
Tulan-59	Endoreic Inland	N/A	Charcoal	14C	1680	50	Gayo et al 2015
Sequitor Alambrado	Endoreic Inland	Beta-251746	Human bone	14C	1680	40	Gayo et al 2015
Sequitor Alambrado	Endoreic Inland	Beta-263472	Human bone	14C	1680	40	Gayo et al 2015
Pampa El Muerto 8	Exoreic Inland	UGAMS-3040	Charcoal	14C	1680	25	Gayo et al 2015
Punta Baquedano	Exoreic Atacama Coast	N/A	Charcoal	14C	1686	73	Gayo et al 2015
Morro Colorado Sitio 02	Endoreic Atacama Coast	Beta-175452	Marine shell	14C	1690	50	Gayo et al 2015
Caserones 1	Endoreic Inland	CAMS-10314	Camelid fiber	14C	1690	60	Gayo et al 2015
Caserones 433	Endoreic Inland	Beta-294694	Charcoal	14C	1690	40	Gayo et al 2015
Tarapaca 40	Endoreic Inland	CAMS-7607	Tunica fiber	14C	1690	60	Gayo et al 2015
Punta Baquedano	Exoreic Atacama Coast	N/A	Charcoal	14C	1695	73	Gayo et al 2015
Quitor 2	Endoreic Inland	X14970A	Human bone	14C	1696	46	Gayo et al 2015
Michilla 02	Endoreic Atacama Coast	Beta-322288	Plant fragments	14C	1700	30	Gayo et al 2015
Gualaguala 01	Endoreic Atacama Coast	Beta-322323	Plant fragments	14C	1710	30	Gayo et al 2015
Chacarilla 15	Endoreic Inland	UCIAMS-77760	Charcoal	14C	1710	35	Gayo et al 2015
Quitor 5-3397	Endoreic Inland	I-1205-D-4	Charcoal	14C	1715	80	Gayo et al 2015
Chacarilla 15	Endoreic Inland	UCIAMS-97250	Charcoal	14C	1715	15	Gayo et al 2015
Punta Baquedano	Exoreic Atacama Coast	N/A	Charcoal	14C	1719	69	Gayo et al 2015
Punta Blanca	Endoreic Atacama Coast	P-2587	N/A	14C	1720	50	Gayo et al 2015
Turi Aldea	Endoreic Inland	Beta-9520	Charcoal	14C	1720	120	Gayo et al 2015
Turi	Endoreic Inland	Beta-9526	Charcoal	14C	1720	120	Gayo et al 2015
Caleta Vitor 2	Exoreic Atacama Coast	OZN924	Human bone	14C	1725	30	Gayo et al 2015
Chacarilla 15	Endoreic Inland	UCIAMS-97254	Charcoal	14C	1730	15	Gayo et al 2015
Taira	Endoreic Inland	Beta-29760	Wood	14C	1730	100	Gayo et al 2015
Caleta Huelen 10	Endoreic Atacama Coast	Hv-557	Human soft tissue	14C	1735	100	Gayo et al 2015
Quebrada Maní 12c	Endoreic Inland	UCIAMS-145155	Plant material	14C	1735	40	Gayo et al 2015
Punta Morada Sector 1	Endoreic Atacama Coast	Beta-175453	Marine shell	14C	1740	50	Gayo et al 2015
Punta Morada Sitio 02 Ta 008	Endoreic Atacama Coast	Beta-175458	Marine shell	14C	1750	50	Gayo et al 2015
A33-R5	Endoreic Inland	Beta-218961	Algarrobo seed	14C	1750	40	Gayo et al 2015
Quebrada Maní 4	Endoreic Inland	UCIAMS-97256	Charcoal	14C	1750	15	Gayo et al 2015
Quebrada Maní 4	Endoreic Inland	UCIAMS-108148	Plant material	14C	1750	15	Gayo et al 2015
Gualaguala 01	Endoreic Atacama Coast	Beta-322322	Plant fragments	14C	1760	30	Gayo et al 2015
Puripica 23	Endoreic Inland	Beta-85225	Charcoal	14C	1760	80	Gayo et al 2015
Caleta Vitor 2	Exoreic Atacama Coast	OZN923	Human bone	14C	1760	30	Gayo et al 2015
Quebrada Maní 4	Endoreic Inland	UCIAMS-97257	Charcoal	14C	1765	15	Gayo et al 2015
Isluga-2	Endoreic Inland	Gak-8373	Animal bone	14C	1770	50	Gayo et al 2015
Caserones 1	Endoreic Inland	CAMS-10321	Fish bone	14C	1770	35	Gayo et al 2015
Caserones 1	Endoreic Inland	Beta-220918	Wood	14C	1770	60	Gayo et al 2015
A33-R3	Endoreic Inland	Beta-218957	Algarrobo seed	14C	1780	40	Gayo et al 2015
Gualaguala 04	Endoreic Atacama Coast	Beta-322285	Plant fragments	14C	1790	30	Gayo et al 2015
Chacarilla 15	Endoreic Inland	UCIAMS-77759	Charcoal	14C	1795	35	Gayo et al 2015
Mejillones cementerio Koppers-1	Endoreic Atacama Coast	N/A	Human bone	14C	1810	80	Gayo et al 2015
Calar	Endoreic Inland	A-14111	Plant fragments	14C	1810	55	Gayo et al 2015
Michilla 02	Endoreic Atacama Coast	Beta-322287	Plant fragments	14C	1820	30	Gayo et al 2015
A33-R3	Endoreic Inland	Beta-218956	Charcoal	14C	1820	40	Gayo et al 2015
Caleta Vitor 4	Exoreic Atacama Coast	UGAMS-10520	Cotton seed	14C	1820	25	Gayo et al 2015
Guatacondo 1	Endoreic Inland	UCLA-1698E	Charcoal	14C	1830	60	Gayo et al 2015
Chacarilla 15	Endoreic Inland	UCIAMS-97251	Charcoal	14C	1840	15	Gayo et al 2015
Caserones 1	Endoreic Inland	Beta-220919	Charred material	14C	1840	40	Gayo et al 2015
RAnL-100	Endoreic Inland	GX-1644	Camelid leader & fiber	14C	1845	105	Gayo et al 2015
Caleta Vitor 6	Exoreic Atacama Coast	OZP070	Bone	14C	1845	30	Gayo et al 2015
Caleta Vitor 6	Exoreic Atacama Coast	S-ANU30739	Bone	14C	1848	25	Gayo et al 2015
Caserones 1	Endoreic Inland	CAMS-10317	Camelid fiber	14C	1850	70	Gayo et al 2015
Tulor-1	Endoreic Inland	P-3351	Charcoal	14C	1850	60	Gayo et al 2015
Caleta Vitor 6	Exoreic Atacama Coast	OZP071	Bone	14C	1850	30	Gayo et al 2015
Garibaldi 1	Exoreic Inland	Beta-88042	Human soft tissue	14C	1850	70	Gayo et al 2015
Solor 3	Endoreic Inland	X14981A	Human bone	14C	1859	47	Gayo et al 2015
Pircas 251	Endoreic Inland	Beta-294701	Charcoal	14C	1860	30	Gayo et al 2015
Hakenasa	Exoreic Inland	Beta-187526	Charcoal	14C	1860	60	Gayo et al 2015
Quebrada Maní 4	Endoreic Inland	UCIAMS-108151	Plant material	14C	1865	15	Gayo et al 2015
A299	Endoreic Inland	Beta-218966	Camelid fiber textile	14C	1870	40	Gayo et al 2015
Pircas 1	Endoreic Inland	N-4368	Charcoal	14C	1880	60	Gayo et al 2015
Caserones 61	Endoreic Inland	Beta-294695	Charcoal	14C	1880	50	Gayo et al 2015
A299	Endoreic Inland	Beta-218965	Camelid fiber textile	14C	1890	40	Gayo et al 2015
Guatacondo 1	Endoreic Inland	IVIC-166	Wood	14C	1890	90	Gayo et al 2015
Caleta Vitor 6	Exoreic Atacama Coast	OZP072	Bone	14C	1890	35	Gayo et al 2015
Patapatane 1	Exoreic Inland	Beta-238855	Charcoal	14C	1890	50	Gayo et al 2015
Tulan-57	Endoreic Inland	N/A	Charcoal	14C	1920	80	Gayo et al 2015
Caleta Vitor 2	Exoreic Atacama Coast	UGAMS-10511	Cotton seed	14C	1930	30	Gayo et al 2015
RAnL-216	Endoreic Inland	GX-1643	Charcoal	14C	1935	110	Gayo et al 2015
Cueva de León	Endoreic Inland	TP3	N/A	14C	1940	50	Troncoso & Pavlovic 2013
Caleta Vitor 6	Exoreic Atacama Coast	OZP069	Bone	14C	1940	30	Gayo et al 2015
Lluta 13	Exoreic Inland	UCIAMS-145250	Prosopis seed	14C	1940	15	Gayo et al 2015
Caleta Vitor 2	Exoreic Atacama Coast	Beta-251627	Charcoal	14C	1960	60	Gayo et al 2015
A33-R5	Endoreic Inland	Beta-218962	Algarrobo seed	14C	1970	40	Gayo et al 2015
Ramaditas 51	Endoreic Inland	Beta-314508	Charcoal	14C	1980	30	Gayo et al 2015
Caleta Huelen 10	Endoreic Atacama Coast	IVIC-789	Camelid fiber textile	14C	2000	70	Gayo et al 2015
Guatacondo 3	Endoreic Inland	Beta-314502	Charcoal	14C	2000	30	Gayo et al 2015
Tarapaca 40	Endoreic Inland	CAMS-10323	Faldellin	14C	2000	60	Gayo et al 2015
Guatacondo 153	Endoreic Inland	Beta-314500	Plant material	14C	2010	30	Gayo et al 2015
Alero El pescador	Endoreic Inland	Beta-129875	Charcoal	14C	2020	80	Gayo et al 2015
Caleta Huelen 7	Endoreic Atacama Coast	IVIC-788	Basketry	14C	2030	80	Gayo et al 2015
Guatacondo 164	Endoreic Inland	Beta-294698	Charcoal	14C	2030	40	Gayo et al 2015
Ramaditas 41	Endoreic Inland	Beta-314511	Charcoal	14C	2030	30	Gayo et al 2015
Punta Blanca	Endoreic Atacama Coast	Beta-320362	Collagen	14C	2040	30	Gayo et al 2015
Ramaditas	Endoreic Inland	TO-3573	Algarrobo	14C	2040	50	Gayo et al 2015
Quebrada Maní 4	Endoreic Inland	UCIAMS-108146	Plant material	14C	2040	15	Gayo et al 2015
Caleta Vitor 2	Exoreic Atacama Coast	Beta-251626	Charcoal	14C	2040	70	Gayo et al 2015
Ramaditas	Exoreic Inland	Beta-48822	Algarrobo	14C	2040	50	Gayo et al 2015
El Torín	Endoreic Inland	TP4	N/A	14C	2050	110	Troncoso & Pavlovic 2013
Guatacondo 3	Endoreic Inland	Beta-314501	Plant material	14C	2050	30	Gayo et al 2015
Ramaditas	Endoreic Inland	TO-4810	Algarrobo seed	14C	2060	60	Gayo et al 2015
A33-R3	Endoreic Inland	Beta-218955	Algarrobo seed	14C	2060	40	Gayo et al 2015
Caserones 1	Endoreic Inland	CAMS-7610	Bird-skin cape	14C	2060	40	Gayo et al 2015
ENAEX	Endoreic Inland	Beta-335825	Collagen	14C	2060	30	Gayo et al 2015
Ipilla-2	Exoreic Inland	UGAMS-77763	Charcoal	14C	2075	35	Gayo et al 2015
Guatacondo 153	Endoreic Inland	Beta-294697	Charcoal	14C	2080	50	Gayo et al 2015
San Salvador	Endoreic Inland	Beta-247417	Plant fragments	14C	2080	40	Gayo et al 2015
A72	Endoreic Inland	Beta-218960	Wood	14C	2080	40	Gayo et al 2015
Caleta Vitor 2	Exoreic Atacama Coast	Beta-251628	Charcoal	14C	2080	40	Gayo et al 2015
Calar	Endoreic Inland	N/A	Charcoal	14C	2090	70	Gayo et al 2015
Guatacondo 99	Endoreic Inland	Beta-294696	Charcoal	14C	2090	40	Gayo et al 2015
A30-R2	Endoreic Inland	Beta-218954	Algarrobo seed	14C	2100	40	Gayo et al 2015
A33-R4	Endoreic Inland	Beta-218959	Algarrobo seed	14C	2110	40	Gayo et al 2015
Cerro Moreno	Exoreic Inland	Beta-189247	Human soft tissue	14C	2110	60	Gayo et al 2015
Cerro Moreno	Exoreic Inland	Beta-246690	Human soft tissue	14C	2110	40	Gayo et al 2015
Topater	Endoreic Inland	Beta-259693	Textile	14C	2120	30	Gayo et al 2015
Caleta Vitor 2	Exoreic Atacama Coast	UGAMS-10510	Algarrobo seed	14C	2120	25	Gayo et al 2015
Chungara 10.2005	Exoreic Inland	UCIAMS-123140	Grounded feces	14C	2120	20	Gayo et al 2015
Alero Chulqui	Endoreic Inland	Beta-7322	Charcoal	14C	2130	50	Gayo et al 2015
Ramaditas 9	Endoreic Inland	Beta-314512	Charcoal	14C	2130	30	Gayo et al 2015
Cerro Moreno	Exoreic Inland	Beta-218169	Human soft tissue	14C	2130	60	Gayo et al 2015
Alero Toconce	Endoreic Inland	Beta-1992	Charcoal	14C	2140	70	Gayo et al 2015
Patache G	Endoreic Atacama Coast	GX-22431	Camelid fiber	14C	2145	75	Gayo et al 2015
Quebrada Mani	Endoreic Inland	UCIAMS-108140	Plant material	14C	2150	15	Gayo et al 2015
RAnL-273 A-1	Endoreic Inland	I-5400	Wood	14C	2150	95	Gayo et al 2015
Quebrada Maní Canales	Endoreic Inland	UCIAMS-108140	Wood	14C	2150	15	Gayo et al 2015
Punta Baquedano	Exoreic Atacama Coast	N/A	Charcoal	14C	2150	121	Gayo et al 2015
Chiu Chiu Cementerio	Endoreic Inland	N/A	N/A	14C	2165	105	Gayo et al 2015
Pircas 232	Endoreic Inland	Beta-294700	Charcoal	14C	2180	40	Gayo et al 2015
Topater	Endoreic Inland	Beta-322289	Plant fragment	14C	2180	40	Gayo et al 2015
Pampa El Muerto 3	Exoreic Inland	UGAMS-3042	Charcoal	14C	2180	30	Gayo et al 2015
Ramaditas	Endoreic Inland	GX-21725	Maize	14C	2210	55	Gayo et al 2015
Caserones 1	Endoreic Inland	CAMS-10315	Feather & bird-skin cape	14C	2225	50	Gayo et al 2015
Tuina-5	Endoreic Inland	Beta-107119	Charcoal	14C	2240	60	Gayo et al 2015
Quebrada Mani	Endoreic Inland	UCIAMS-84344	Charcoal	14C	2240	15	Gayo et al 2015
Tulan-58	Endoreic Inland	Beta-32387	Dung	14C	2240	50	Gayo et al 2015
Cementerio Regimiento Chorrillo	Endoreic Inland	Beta-204964	Human bone	14C	2240	40	Gayo et al 2015
Quebrada Mani	Endoreic Inland	UCIAMS-108141	Plant material	14C	2240	15	Gayo et al 2015
Ramaditas 17	Endoreic Inland	Beta-314509	Wood	14C	2240	30	Gayo et al 2015
Ramaditas 41	Endoreic Inland	Beta-314510	Wood	14C	2240	30	Gayo et al 2015
Quebrada Maní Canales	Endoreic Inland	UCIAMS-108141	Wood	14C	2240	15	Gayo et al 2015
Cementerio Regimiento Chorrillo	Endoreic Inland	Beta-206816	Human bone	14C	2260	40	Gayo et al 2015
Cobija 10	Endoreic Atacama Coast	Beta-3113	Charcoal	14C	2270	70	Gayo et al 2015
Conanoxa	Exoreic Inland	IVIC-344	Camelid fiber textile	14C	2270	70	Gayo et al 2015
Ramaditas	Endoreic Inland	AA-53448	Plant material	14C	2278	46	Gayo et al 2015
Ramaditas	Endoreic Inland	AA-39925	Plant material	14C	2285	43	Gayo et al 2015
Azapa 70	Exoreic Inland	N/A	Human soft tissue	14C	2285	80	Gayo et al 2015
Quebrada Mani 19	Endoreic Inland	UCIAMS-97259	Charcoal	14C	2290	15	Gayo et al 2015
Caserones 1	Endoreic Inland	GaK-2894	Wood	14C	2290	110	Gayo et al 2015
Ramaditas	Endoreic Inland	GX-19200	Algarrobo seed	14C	2297	73	Gayo et al 2015
Caleta Abtao-5	Endoreic Atacama Coast	P-2588	N/A	14C	2300	50	Gayo et al 2015
Alero Toconce	Endoreic Inland	Beta-1993	Charcoal	14C	2300	70	Gayo et al 2015
Quebrada Mani	Endoreic Inland	UCIAMS-84742	Prosopis sp leaves	14C	2310	20	Gayo et al 2015
Caleta Huelen 10A	Endoreic Atacama Coast	IVIC-790	Wood	14C	2320	80	Gayo et al 2015
TGN-1	Endoreic Inland	UGAMS-6001	Collagen	14C	2320	25	Gayo et al 2015
Ramaditas	Exoreic Inland	Beta-50834	Charcoal	14C	2320	60	Gayo et al 2015
San Salvador	Endoreic Inland	Beta-247418	Plant fragments	14C	2330	40	Gayo et al 2015
Cementerio Regimiento Chorrillo	Endoreic Inland	Beta-204963	Human bone	14C	2350	40	Gayo et al 2015
Azapa 84	Exoreic Inland	GaK-5815	Wood	14C	2360	90	Gayo et al 2015
Tiliviche 1-B	Exoreic Inland	SI-5057	Charcoal	14C	2365	115	Gayo et al 2015
Guatacondo 1	Endoreic Inland	UCLA-1698B	Cane & reed	14C	2370	60	Gayo et al 2015
Punta Baquedano	Exoreic Atacama Coast	N/A	Charcoal	14C	2379	57	Gayo et al 2015
Tulan-54	Endoreic Inland	Beta-198843	Charcoal	14C	2380	70	Gayo et al 2015
Tulan-54	Endoreic Inland	Beta-210515	Charcoal	14C	2390	60	Gayo et al 2015
Cementerio Regimiento Chorrillo	Endoreic Inland	Beta-206819	Human bone	14C	2390	40	Gayo et al 2015
A299	Endoreic Inland	Beta-218964	Human soft tissue	14C	2390	40	Gayo et al 2015
Chapicollo 1	Exoreic Inland	Beta-24354	Charcoal	14C	2390	60	Gayo et al 2015
Caleta Huelen 43	Endoreic Atacama Coast	GaK-3544	Camelid fiber textile	14C	2400	90	Gayo et al 2015
Tulan-55	Endoreic Inland	Beta-123456	Charcoal	14C	2400	60	Gayo et al 2015
Tulan-109	Endoreic Inland	Beta-200614	Plant material	14C	2410	70	Gayo et al 2015
Azapa 70	Exoreic Inland	N/A	Camelid fiber textile	14C	2415	75	Gayo et al 2015
Tulan-54	Endoreic Inland	Beta-44414	Charcoal	14C	2420	70	Gayo et al 2015
Caleta Vitor 3	Exoreic Atacama Coast	OZN919	Human bone	14C	2420	35	Gayo et al 2015
Pircas 2	Exoreic Inland	I-13228	Human soft tissue	14C	2420	80	Gayo et al 2015
Punta Baquedano	Exoreic Atacama Coast	N/A	Charcoal	14C	2428	53	Gayo et al 2015
Tulan-54	Endoreic Inland	Beta-210506	Charcoal	14C	2430	60	Gayo et al 2015
Ramaditas	Endoreic Inland	AA-39924	Plant material	14C	2435	63	Gayo et al 2015
Azapa 70	Exoreic Inland	GaK-5818	Yuca	14C	2440	100	Gayo et al 2015
Portezuelo Choluto Sitio 4	Endoreic Atacama Coast	Beta-169216	Animal bone	14C	2450	40	Gayo et al 2015
Chacarilla 15	Endoreic Inland	UCIAMS-84351	Charcoal	14C	2450	15	Gayo et al 2015
Chacarilla 15	Endoreic Inland	UCIAMS-97252	Charcoal	14C	2450	15	Gayo et al 2015
Cerro Moreno	Exoreic Inland	Beta-218168	Human soft tissue	14C	2450	60	Gayo et al 2015
Chacarilla 15	Endoreic Inland	UCIAMS-84350	Charcoal	14C	2460	15	Gayo et al 2015
Pampa El Muerto 3	Exoreic Inland	UGAMS-3043	Charcoal	14C	2460	30	Gayo et al 2015
Tarapaca 40	Endoreic Inland	Beta-370288	Teeth/bones	14C	2470	30	Gayo et al 2015
Ramaditas	Endoreic Inland	GX-19201	Charcoal	14C	2480	100	Gayo et al 2015
Chacarilla 15	Endoreic Inland	UCIAMS-84349	Charcoal	14C	2480	15	Gayo et al 2015
ENAEX	Endoreic Inland	Beta-335826	Collagen	14C	2480	30	Gayo et al 2015
Playa Miller 7	Exoreic Atacama Coast	GaK-5812	Cotton seed	14C	2480	100	Gayo et al 2015
Tulan-54	Endoreic Inland	Beta-44413	Charcoal	14C	2490	80	Gayo et al 2015
Pircas	Endoreic Inland	OXA-1373	Charcoal	14C	2490	60	Gayo et al 2015
Tulan-54	Endoreic Inland	Beta-210513	Charcoal	14C	2490	40	Gayo et al 2015
Cementerio Regimiento Chorrillo	Endoreic Inland	Beta-206817	Human bone	14C	2490	40	Gayo et al 2015
Caleta Vitor 2	Exoreic Atacama Coast	UGAMS-10512	Cotton seed	14C	2490	25	Gayo et al 2015
SBA-43	Endoreic Inland	Beta-86759	Charcoal	14C	2500	70	Gayo et al 2015
Chacarilla 15	Endoreic Inland	UCIAMS-97249	Charcoal	14C	2510	15	Gayo et al 2015
Azapa 84	Exoreic Inland	GaK-7402	Human soft tissue	14C	2510	130	Gayo et al 2015
Chacarilla 15	Endoreic Inland	UCIAMS-84352	Charcoal	14C	2520	15	Gayo et al 2015
Pinuta	Exoreic Inland	I-12833	Charcoal	14C	2520	90	Gayo et al 2015
Caleta Vitor 2	Exoreic Atacama Coast	OZP073	Bone	14C	2525	60	Gayo et al 2015
Caleta Vitor 2	Exoreic Atacama Coast	ANU-31013	Charcoal	14C	2525	35	Gayo et al 2015
Tulan-54	Endoreic Inland	Beta-240512	Charcoal	14C	2530	60	Gayo et al 2015
Tulan-54	Endoreic Inland	Beta-198841	Charcoal	14C	2540	70	Gayo et al 2015
Cementerio Regimiento Chorrillo	Endoreic Inland	Beta-205814	Human bone	14C	2540	40	Gayo et al 2015
Tarapaca 40	Endoreic Inland	Beta-355778	Teeth/bones	14C	2540	30	Gayo et al 2015
Tulan-54	Endoreic Inland	Beta-198846	Human bone	14C	2550	70	Gayo et al 2015
Ramaditas	Endoreic Inland	AA-35463	Charcoal & organic material	14C	2555	45	Gayo et al 2015
Quebrada Mani	Endoreic Inland	UCIAMS-108142	Plant material	14C	2555	15	Gayo et al 2015
Quebrada Maní Canales	Endoreic Inland	UCIAMS-108142	Wood	14C	2555	15	Gayo et al 2015
Cementerio Regimiento Chorrillo	Endoreic Inland	Beta-206818	Human bone	14C	2560	40	Gayo et al 2015
Patapatane 1	Exoreic Inland	Beta-238857	Charcoal	14C	2560	50	Gayo et al 2015
Azapa 71	Exoreic Inland	I-10857	Human soft tissue	14C	2560	85	Gayo et al 2015
Chacarilla 15	Endoreic Inland	UCIAMS-123269	Dung	14C	2565	15	Gayo et al 2015
Patache N	Endoreic Atacama Coast	GX-22435	Charcoal	14C	2575	90	Gayo et al 2015
Caleta Vitor 4	Exoreic Atacama Coast	OZN920	Human bone	14C	2575	35	Gayo et al 2015
Playa Miller 7	Exoreic Inland	N/A	Hair	14C	2575	30	Gayo et al 2015
Tulan-54	Endoreic Inland	N/A	Charcoal	14C	2580	70	Gayo et al 2015
Cementerio Regimiento Chorrillo	Endoreic Inland	Beta-205812	Human bone	14C	2590	40	Gayo et al 2015
Tojotojone 1	Exoreic Inland	Beta-24358	Charcoal	14C	2590	80	Gayo et al 2015
Playa Miller 7	Exoreic Inland	N/A	Hair	14C	2590	30	Gayo et al 2015
Punta Blanca	Endoreic Atacama Coast	Beta-320361	Collagen	14C	2600	30	Gayo et al 2015
Azapa 71	Exoreic Inland	I-10858	Human soft tissue	14C	2605	85	Gayo et al 2015
Los Danzantes	Endoreic Inland	Beta-117561	Charcoal	14C	2620	90	Gayo et al 2015
Tulor-1	Endoreic Inland	P-3350	Charcoal	14C	2620	60	Gayo et al 2015
Tulan-54	Endoreic Inland	Beta-200616	Charcoal	14C	2630	70	Gayo et al 2015
Tulan-54	Endoreic Inland	Beta-44415	Charcoal	14C	2630	70	Gayo et al 2015
Tulan-54	Endoreic Inland	Beta-198844	Charcoal	14C	2630	60	Gayo et al 2015
Cementerio Regimiento Chorrillo	Endoreic Inland	Beta-205813	Human bone	14C	2630	40	Gayo et al 2015
Pampa El Muerto	Exoreic Inland	Beta-24356	Charcoal	14C	2630	50	Gayo et al 2015
Chacarilla 15	Endoreic Inland	UCIAMS-123265	Dung	14C	2640	20	Gayo et al 2015
A71	Endoreic Inland	Beta-218963	Wood	14C	2640	40	Gayo et al 2015
Azapa 84	Exoreic Inland	GaK-7403	Human soft tissue	14C	2640	110	Gayo et al 2015
Playa Miller 7	Exoreic Inland	N/A	Hair	14C	2645	30	Gayo et al 2015
Playa Miller 7	Exoreic Inland	N/A	Hair	14C	2650	30	Gayo et al 2015
Tulan-85	Endoreic Inland	Beta-32388	Charcoal	14C	2660	80	Gayo et al 2015
Azapa 71	Exoreic Inland	I-10860	Human soft tissue	14C	2660	85	Gayo et al 2015
Plaza de Indios Norte	Endoreic Atacama Coast	Beta-169218	Shell	14C	2670	70	Gayo et al 2015
Playa Miller 7	Exoreic Inland	N/A	Hair	14C	2685	30	Gayo et al 2015
Azapa 71	Exoreic Inland	I-10859	Human soft tissue	14C	2685	85	Gayo et al 2015
Pisagua 7	Exoreic Atacama Coast	GX-16098	Charcoal	14C	2695	85	Gayo et al 2015
Tulan-55	Endoreic Inland	Beta-16981	Charcoal	14C	2700	100	Gayo et al 2015
Morro 2/2	Exoreic Atacama Coast	Beta-23401	Human soft tissue	14C	2700	80	Gayo et al 2015
Tulan-54	Endoreic Inland	Beta-210507	Charcoal	14C	2720	70	Gayo et al 2015
Alero Toconce	Endoreic Inland	Beta-1994	Charcoal	14C	2720	65	Gayo et al 2015
Chacarilla 15	Endoreic Inland	UCIAMS-97253	Charcoal	14C	2720	15	Gayo et al 2015
Tojotojone	Exoreic Inland	UGAMS-8340	Charcoal	14C	2740	25	Gayo et al 2015
Marilyn Manson	Endoreic Inland	Beta-144000	Charcoal	14C	2750	40	Gayo et al 2015
Tarapaca 40	Endoreic Inland	Beta-370287	Teeth/bones	14C	2750	30	Gayo et al 2015
Morro 2/2	Exoreic Atacama Coast	Beta-23403	Human soft tissue	14C	2750	80	Gayo et al 2015
Canamo 1	Endoreic Atacama Coast	TK-103b	Charcoal	14C	2770	130	Gayo et al 2015
Morro 2/2	Exoreic Atacama Coast	Beta-23402	Human soft tissue	14C	2770	80	Gayo et al 2015
Tulan-122	Endoreic Inland	Beta-188224	Charcoal	14C	2780	140	Gayo et al 2015
Tulan-54	Endoreic Inland	Beta-200617	Charcoal	14C	2790	60	Gayo et al 2015
La Capilla 1	Exoreic Atacama Coast	GaK-8777	Bone	14C	2790	140	Gayo et al 2015
Llano de los Muertos	Endoreic Atacama Coast	Beta-169217	Shell	14C	2800	60	Gayo et al 2015
Patapatane 1	Exoreic Inland	Beta-238856	Charcoal	14C	2800	40	Gayo et al 2015
Tarapaca 40	Endoreic Inland	CAMS-10324	Faldellin	14C	2810	60	Gayo et al 2015
Hakenasa	Exoreic Inland	Beta-187527	Charcoal	14C	2810	60	Gayo et al 2015
Canamo 1	Endoreic Atacama Coast	GaK-6883	Charcoal	14C	2820	100	Gayo et al 2015
Guatacondo 1	Endoreic Inland	UCLA-1698A	Basketry	14C	2830	50	Gayo et al 2015
Canamo 1	Endoreic Atacama Coast	TK-103a	Charcoal	14C	2840	130	Gayo et al 2015
Tulan-54	Endoreic Inland	OXA-1839	Camelid fiber	14C	2840	60	Gayo et al 2015
Tulan-54	Endoreic Inland	Beta-210514	Charcoal	14C	2840	40	Gayo et al 2015
Tarapaca 40	Endoreic Inland	Beta-355776	Teeth/bones	14C	2840	30	Gayo et al 2015
Camarones 15-B	Exoreic Atacama Coast	Beta-23400	Human soft tissue	14C	2840	100	Gayo et al 2015
Azapa 71	Exoreic Inland	I-10856	Human soft tissue	14C	2855	85	Gayo et al 2015
Pta. Guanillo: 21º58's 70º11'W	Endoreic Atacama Coast	Pa-1909	Charcoal	14C	2865	140	Gayo et al 2015
Patache M	Endoreic Atacama Coast	GX-22434	Charcoal	14C	2870	145	Gayo et al 2015
Caserones 1	Endoreic Inland	N/A	Human hair	14C	2870	80	Gayo et al 2015
Tulan-94	Endoreic Inland	Beta-26021	Charcoal	14C	2890	120	Gayo et al 2015
Los Morros 3	Endoreic Inland	Beta-149919	Charcoal	14C	2910	40	Gayo et al 2015
Camarones 15-D	Exoreic Atacama Coast	GX-18257	Human soft tissue	14C	2915	70	Gayo et al 2015
Pta. Guanillo: 21º58's 70º11'W	Endoreic Atacama Coast	Pa-1931	C. Concholepas	14C	2930	70	Gayo et al 2015
Tulan-54	Endoreic Inland	OXA-1838	Camelid fiber	14C	2940	60	Gayo et al 2015
La Morula	Endoreic Inland	Beta-144003	Charcoal	14C	2960	40	Gayo et al 2015
Punta Pichalo	Endoreic Atacama Coast	GaK-9537	Charcoal	14C	2970	130	Gayo et al 2015
La Capilla 1	Exoreic Atacama Coast	Beta-319881	Vegetal fiber material	14C	2970	30	Gayo et al 2015
Confluencia	Endoreic Inland	Beta-144002	Charcoal	14C	2980	100	Gayo et al 2015
Tulan-54	Endoreic Inland	Beta-200618	Charcoal	14C	2990	70	Gayo et al 2015
Tulan-54	Endoreic Inland	Beta-18197	Dung	14C	2990	70	Gayo et al 2015
Tulan-54	Endoreic Inland	OXA-1841	Camelid fiber	14C	3000	60	Gayo et al 2015
Tulan-55	Endoreic Inland	Beta-188217	Charcoal	14C	3010	40	Gayo et al 2015
Tulan-54	Endoreic Inland	Beta-25506	Charcoal	14C	3030	70	Gayo et al 2015
Camarones 15	Exoreic Atacama Coast	GaK-5813	Wood	14C	3060	100	Gayo et al 2015
Tulan-54	Endoreic Inland	OXA-1840	Camelid fiber	14C	3080	70	Gayo et al 2015
La Capilla 1	Exoreic Atacama Coast	Beta-319882	Vegetal fiber material	14C	3080	30	Gayo et al 2015
Notes:
Exoreic Atacama Coast= From Arica (18°S) to Quebrada Camiña (19º 30'S)
Endoreic Atacama Coast=From Quebrada Camiña (19° 30'S) to Huasco (28°S)
Exoreic Inland= Inland areas from Arica (18°S) to Quebrada Camiña (19º30'S), including the Intermediate Valley, Andean Precordillera and Altiplano
Endoreic Inland=From Quebrada Camiña (19° 30'S) to Huasco (28°S), including the Intermediate Valley, Andean Precordillera and Altiplano

## Sheet: Central Chile Database
Supplemental Data 1
Article title: Geohistorical records of the Anthropocene in Chile
Eugenia M. Gayo1,2,3*, Virginia B. McRostie4, Roberto Campbell4, Carola Flores1,5, Antonio Maldonado5,6, Mauricio Uribe-Rodriguez7, Patricio I. Moreno1,8, Calogero M. Santoro9, Duncan A. Christie1,10, Ariel A. Muñoz1,11, Laura Gallardo1,12
1 Center for Climate and Resilience Research (CR2, FONDAP 15110009), Chile, 2 Laboratory for Stable Isotope Biogeochemistry, Departamento de Oceanografía, Universidad de Concepción, Concepción, Chile, 3 Center of Applied Ecology and Sustainability (CAPES), 4 Programa de Antropología, Instituto de Sociología, Pontificia Universidad Católica de Chile, Santiago, Chile, 5 Centro de Estudios Avanzados…
Dataset 2: Chronological determinations used for reconstructing paleodemographic trends in the Cemtral Chile region over the past 3,000 years
Site	Environment / Locality	ID Sample	Material	Dating Method	Uncalibrated Age	Standard Error	Source
Lonquen E80/4	Santiago basin	UCTL1230	Ceramic	TL	85	200	Sanhueza et al 2003
Lonquen E80/4	Santiago basin	UCTL1232	Ceramic	TL	105	200	Sanhueza et al 2003
Radio Estacion Naval	Santiago basin	UCTL1098	Ceramic	TL	110	200	Sanhueza et al 2003
Bato 2	Choapa Valley	TP21	Ceramic	TL	115	160	Troncoso & Pavlovic 2013
Radio Estacion Naval	Santiago basin	UCTL1097	Ceramic	TL	115	100	Sanhueza et al 2003
El Mercurio	Santiago basin	UCTL311	Ceramic	TL	120	180	Sanhueza et al 2003
Lu-69. Tren Trenkuel	Puren-Lumaco	AA64643	Charcoal	14C	125	40	Campbell & Quiroz 2015
Dos Canoas	Calafquén	Beta205208	Wood	14C	130	70	Campbell & Quiroz 2015
Montículo Norte	Isla Mocha	KCCAMS109404	Charcoal	14C	135	15	Campbell & Quiroz 2015
Canoa Lago Lleu-Lleu	Tranaquepe-Tirúa	Beta220273	Wood	14C	140	50	Campbell & Quiroz 2015
El Mercurio	Santiago basin	UCTL189	Ceramic	TL	150	150	Sanhueza et al 2003
Cipreses (alero)	Rancagua basin	UCTL1661	Ceramic	TL	160	160	Sanhueza et al 2006
Pu-220. Maicoyakuel	Puren-Lumaco	Beta167558	Charcoal	14C	160	40	Campbell & Quiroz 2015
Batuco 2	Choapa Valley	TP22	Ceramic	TL	165	190	Troncoso & Pavlovic 2013
LV099B	Choapa Valley	TP23	Ceramic	TL	170	180	Troncoso & Pavlovic 2013
Radio Estacion Naval	Santiago basin	UCTL1096	Ceramic	TL	175	160	Sanhueza et al 2003
Caseron (alero)	Rancagua basin	UCTL1771	Ceramic	TL	180	180	Sanhueza et al 2006
Parque La Quintrala	Santiago basin	UCTL1101	Ceramic	TL	180	180	Sanhueza et al 2003
Radio Estacion Naval	Santiago basin	GaK6405	N/A	14C	180	90	Sanhueza et al 2003
Bato 2	Choapa Valley	TP24	Ceramic	TL	185	190	Troncoso & Pavlovic 2013
Caseron (alero)	Rancagua basin	UCTL1773	Ceramic	TL	210	180	Sanhueza et al 2006
P25-1	Isla Mocha	Gd9198	Charcoal	14C	240	170	Campbell & Quiroz 2015
Caseron (alero)	Rancagua basin	UCTL1769	Ceramic	TL	250	180	Sanhueza et al 2006
Pu-220. Maicoyakuel	Puren-Lumaco	Beta167559	Charcoal	14C	250	60	Campbell & Quiroz 2015
Pu-220. Maicoyakuel	Puren-Lumaco	Beta69000	Charcoal	14C	250	60	Campbell & Quiroz 2015
Canoa Lago Colico	Colico-Caburgua	Beta220272	Wood	14C	270	50	Campbell & Quiroz 2015
El Almendral RML 002	Santiago basin	UCTL1004	Ceramic	TL	270	150	Sanhueza et al 2003
P25-1	Isla Mocha	Gd10008	Charcoal	14C	270	100	Campbell & Quiroz 2015
Parcela Alejandro Manquez	Choapa Valley	TP25	Ceramic	TL	270	100	Troncoso & Pavlovic 2013
Parque La Quintrala	Santiago basin	UCTL1100	Ceramic	TL	275	100	Sanhueza et al 2003
San Agustín 12	Choapa Valley	TP26	Ceramic	TL	275	140	Troncoso & Pavlovic 2013
Bato 2	Choapa Valley	TP27	Ceramic	TL	280	170	Troncoso & Pavlovic 2013
Canoa Río Maullín	Maullín	Beta220271	Wood	14C	280	40	Campbell & Quiroz 2015
El Mercurio	Santiago basin	UCTL188	Ceramic	TL	300	140	Sanhueza et al 2003
San Agustin	Choapa Valley	TP28	Ceramic	TL	300	130	Troncoso & Pavlovic 2013
P21-1	Isla Mocha	Beta162420	Charcoal	14C	310	60	Campbell & Quiroz 2015
Pichicullín	Chanchan	Beta44558	Charcoal	14C	310	90	Campbell & Quiroz 2015
Dos Canoas	Calafquén	Beta205209	Wood	14C	330	80	Campbell & Quiroz 2015
P31-1	Isla Mocha	AA89423	Charcoal	14C	334	34	Campbell & Quiroz 2015
Cerro Mercachas	Upper Aconcagua River	UCTL1407	Ceramic	TL	350	30	Sanchez 2001
Estero Lumaco-1	Los Lagos-Antilhue	Beta214380	Charcoal	14C	350	50	Campbell & Quiroz 2015
El Mercurio	Santiago basin	UCTL985	Ceramic	TL	370	100	Sanhueza et al 2003
Bato 1	Choapa Valley	TP29	Ceramic	TL	390	80	Troncoso & Pavlovic 2013
P31-1	Isla Mocha	AA89421	Charcoal	14C	408	37	Campbell & Quiroz 2015
Ilque	Reloncaví	Beta156419	Charcoal	14C	410	60	Campbell & Quiroz 2015
P21-1	Isla Mocha	Beta75240	Charcoal	14C	420	80	Campbell & Quiroz 2015
Pucara El Tártaro	Upper Aconcagua River	UCTL1251	Ceramic	TL	420	40	Sanchez 2001
Chacayes	Santiago basin	GaK6405	N/A	14C	430	90	Sanhueza et al 2003
Pu-165	Puren-Lumaco	AA203868	Seed	14C	430	40	Campbell & Quiroz 2015
Pancho Pistolas RML 001	Santiago basin	UCTL1005	Ceramic	TL	435	100	Sanhueza et al 2003
Parcela Alejandro Manquez	Choapa Valley	TP30	Ceramic	TL	435	100	Troncoso & Pavlovic 2013
P31-1	Isla Mocha	Gd7152	Charcoal	14C	450	50	Campbell & Quiroz 2015
Canoa Lago Chapo	Lago Chapo	Beta207295	Wood	14C	460	70	Campbell & Quiroz 2015
El Mercurio	Santiago basin	UCTL187	Ceramic	TL	460	150	Sanhueza et al 2003
Paso Hondo 1	Choapa Valley	TP31	Ceramic	TL	460	190	Troncoso & Pavlovic 2013
El Almendral RML 002	Santiago basin	AA68047	Bone collagen	14C	467	44	Falabella et al 2007
Cheuque / Che-4	Chanchan	Beta33312	Charcoal	14C	470	120	Campbell & Quiroz 2015
El Manzano 2	Santiago basin	UCTL1217	Ceramic	TL	470	150	Sanhueza et al 2003
El Mercurio	Santiago basin	UCTL986	Ceramic	TL	470	100	Sanhueza et al 2003
Pelluhuín Bajo	Reloncaví	Beta156416	Charcoal	14C	470	60	Campbell & Quiroz 2015
Bato 4	Choapa Valley	TP32	Ceramic	TL	475	100	Troncoso & Pavlovic 2013
Palmilla 2	Choapa Valley	TP33	Ceramic	TL	480	110	Troncoso & Pavlovic 2013
Pucara El Tártaro	Upper Aconcagua River	UCTL1254	Ceramic	TL	480	50	Sanchez 2001
SM-29	Isla Santa María	Beta237529	Charcoal	14C	480	40	Campbell & Quiroz 2015
El Castillo	Upper Aconcagua River	UCTL1243	Ceramic	TL	485	50	Sanchez 2001
El Tome 1	Choapa Valley	TP34	Ceramic	TL	490	110	Troncoso & Pavlovic 2013
Loma El Arenal	Choapa Valley	TP150	N/A	14C	500	30	Troncoso & Pavlovic 2013
P31-1	Isla Mocha	Beta57811	Charcoal	14C	500	50	Campbell & Quiroz 2015
P31-1	Isla Mocha	Gd7174	Charcoal	14C	500	40	Campbell & Quiroz 2015
Pucara El Tártaro	Upper Aconcagua River	UCTL1255	Ceramic	TL	500	40	Sanchez 2001
Km 0 - Enlace Cajón	Temuco	N/A	Charcoal	14C	505	65	Campbell & Quiroz 2015
El Arenal 1	Quidico-Yani	NZA28272	Bone	14C	506	30	Campbell & Quiroz 2015
Caseron (alero)	Rancagua basin	UCTL1665	Ceramic	TL	510	130	Sanhueza et al 2006
El Arenal 1	Quidico-Yani	NZA28271	Bone	14C	510	30	Campbell & Quiroz 2015
P31-1	Isla Mocha	Beta95085	Charcoal	14C	510	60	Campbell & Quiroz 2015
CK11/A, P20.3	Angostura micro region	UCTL2362	Ceramic	TL	515	50	Falabella et al 2015
Ranqui 4	Choapa Valley	TP35	Ceramic	TL	515	120	Troncoso & Pavlovic 2013
P31-1	Isla Mocha	AA89422	Charcoal	14C	519	37	Campbell & Quiroz 2015
Cerro Mercachas	Upper Aconcagua River	UCTL1406	Ceramic	TL	525	50	Sanchez 2001
C_sped 1	Choapa Valley	TP147	N/A	14C	530	25	Troncoso & Pavlovic 2013
CK10/A, P24.1	Angostura micro region	UCTL2356	Ceramic	TL	530	40	Falabella et al 2015
P31-1	Isla Mocha	Gd6429	Charcoal	14C	530	80	Campbell & Quiroz 2015
P31-1	Isla Mocha	Gd7144	Charcoal	14C	530	60	Campbell & Quiroz 2015
P12-1	Isla Mocha	Beta79917	Charcoal	14C	550	70	Campbell & Quiroz 2015
Pu-221. Rapahuekuel	Puren-Lumaco	Beta167559	Charcoal	14C	550	40	Campbell & Quiroz 2015
VP2/A, 8.c21.2	Angostura micro region	UCTL2176	Ceramic	TL	550	45	Falabella et al 2015
CK18, P6.1	Angostura micro region	UCTL2366	Ceramic	TL	555	50	Falabella et al 2015
Hospital G16/1	Santiago basin	UCTL1109	Ceramic	TL	555	150	Sanhueza et al 2003
Pucara El Tártaro	Upper Aconcagua River	UCTL1252	Ceramic	TL	555	60	Sanchez 2001
Caracoles Abierto	Rancagua basin	UCTL1671	Ceramic	TL	560	130	Sanhueza et al 2006
Hospital G16/1	Santiago basin	UCTL1110	Ceramic	TL	560	105	Sanhueza et al 2003
Loma El Arenal	Choapa Valley	TP148	N/A	14C	560	25	Troncoso & Pavlovic 2013
Loma El Arenal	Choapa Valley	TP151	N/A	14C	560	30	Troncoso & Pavlovic 2013
Lu-9	Puren-Lumaco	Beta169771	Charcoal	14C	560	50	Campbell & Quiroz 2015
P31-1	Isla Mocha	Gd5901	Charcoal	14C	560	40	Campbell & Quiroz 2015
LV163	Choapa Valley	TP36	Ceramic	TL	565	250	Troncoso & Pavlovic 2013
El Almendral RML 002	Santiago basin	UCTL1003	Ceramic	TL	570	100	Sanhueza et al 2003
El Membrillar 2	Concón	UCTL1774	Ceramic	TL	570	45	Avalos et al 2006
SM-30	Isla Santa María	Beta237532	Seed	14C	570	40	Campbell & Quiroz 2015
RML 008 "Blanca Gutierrez" Sector 3	Upper Aconcagua River	UCTL901	Ceramic	TL	575	60	Sanchez 2001
CK5/B, P19.1	Angostura micro region	UCTL2343	Ceramic	TL	580	50	Falabella et al 2015
RML 021 "Cementerio El Algarrobal" (Til-Til)	Upper Aconcagua River	UCTL711	Ceramic	TL	580	60	Sanchez 2001
VP3/B, R3i-6.18.2	Angostura micro region	UCTL2137	Ceramic	TL	580	50	Falabella et al 2015
Caseron (alero)	Rancagua basin	UCTL1772	Ceramic	TL	585	140	Sanhueza et al 2006
CK16, P1.1	Angostura micro region	UCTL2303	Ceramic	TL	585	50	Falabella et al 2015
El Castillo	Upper Aconcagua River	UCTL1244	Ceramic	TL	590	60	Sanchez 2001
El Tome 13	Choapa Valley	TP37	Ceramic	TL	590	130	Troncoso & Pavlovic 2013
Laguna El Peral-C	Coastal Maipo basin	N/A	Ceramic	TL	590	140	Falabella et al 2007
Q. Chanchurria	Choapa Valley	TP38	Ceramic	TL	590	140	Troncoso & Pavlovic 2013
Chan Chan-1	Chanchan	Beta33311	Charcoal	14C	600	50	Campbell & Quiroz 2015
El Castillo	Upper Aconcagua River	UCTL1246	Ceramic	TL	600	60	Sanchez 2001
Pichicav_n 10	Choapa Valley	TP39	Ceramic	TL	600	100	Troncoso & Pavlovic 2013
Pu-209	Puren-Lumaco	Beta191668	Charcoal	14C	600	20	Campbell & Quiroz 2015
Pucara El Tártaro	Upper Aconcagua River	UCTL1249	Ceramic	TL	600	50	Sanchez 2001
Las Mercedes	Maipo basin	AA64987	Bone collagen	14C	602	33	Falabella et al 2007
Cerro Mercachas	Upper Aconcagua River	UCTL1405	Ceramic	TL	610	60	Sanchez 2001
Loma Las Pircas	Choapa Valley	TP40	Ceramic	TL	610	140	Troncoso & Pavlovic 2013
El Castillo	Upper Aconcagua River	UCTL1245	Ceramic	TL	615	60	Sanchez 2001
RML 008 "Blanca Gutierrez" Sector 3	Upper Aconcagua River	UCTL902	Ceramic	TL	615	60	Sanchez 2001
CK5/C1, P40.5	Angostura micro region	UCTL2345	Ceramic	TL	620	60	Falabella et al 2015
Loma El Arenal	Choapa Valley	TP149	N/A	14C	620	25	Troncoso & Pavlovic 2013
P25-1	Isla Mocha	Beta132088	Charcoal	14C	620	60	Campbell & Quiroz 2015
Pancho Pistolas RML 001	Santiago basin	UCTL1006	Ceramic	TL	620	100	Sanhueza et al 2003
SM-39	Isla Santa María	Beta310946	Bone	14C	620	30	Campbell & Quiroz 2015
El Arenal 1	Quidico-Yani	NZA26115	Bone	14C	622	35	Campbell & Quiroz 2015
Pelluhuín Alto	Reloncaví	Beta140444	Shell	14C	630	60	Campbell & Quiroz 2015
Pucara El Tártaro	Upper Aconcagua River	UCTL1250	Ceramic	TL	630	50	Sanchez 2001
El Membrillar 2	Concón	UCTL1778	Ceramic	TL	635	65	Avalos et al 2006
El Mercurio	Santiago basin	UCTL987	Ceramic	TL	635	130	Sanhueza et al 2003
CK11/A, P12.2	Angostura micro region	UCTL2360	Ceramic	TL	640	60	Falabella et al 2015
El Manzano 2	Santiago basin	UCTL1126	Ceramic	TL	640	140	Sanhueza et al 2003
El Mercurio	Santiago basin	UCTL270	Ceramic	TL	640	150	Sanhueza et al 2003
P21-1	Isla Mocha	Beta75239	Charcoal	14C	640	50	Campbell & Quiroz 2015
P31-1	Isla Mocha	Gd6431	Charcoal	14C	640	90	Campbell & Quiroz 2015
Pucara El Tártaro	Upper Aconcagua River	UCTL1253	Ceramic	TL	640	60	Sanchez 2001
Los Panales	Santiago basin	UCTL694	Ceramic	TL	645	100	Sanhueza et al 2003
El Peuco	Rancagua basin	UCTL1666	Ceramic	TL	650	110	Sanhueza et al 2006
VP4, 23.P3.2	Angostura micro region	UCTL2161	Ceramic	TL	650	60	Falabella et al 2015
Chuchunco	Rancagua basin	UCTL1763	Ceramic	TL	660	105	Sanhueza et al 2006
Co-2 (La Obra 2)	Coronel	Beta143905	Shell	14C	660	70	Campbell & Quiroz 2015
Pu-165	Puren-Lumaco	AA64654	Charcoal	14C	660	40	Campbell & Quiroz 2015
Alero Cabeza de Indio 1	Melipeuco	Beta241263	Charcoal	14C	670	40	Campbell & Quiroz 2015
Budi fields	Puerto Saavedra	Beta167596	Organic Sediment	14C	670	40	Campbell & Quiroz 2015
Caseron (alero)	Rancagua basin	UCTL1770	Ceramic	TL	670	140	Sanhueza et al 2006
El Manzano 2	Santiago basin	UCTL1216	Ceramic	TL	670	140	Sanhueza et al 2003
Hospital G16/1	Santiago basin	UCTL1108	Ceramic	TL	670	130	Sanhueza et al 2003
Padre Las Casas	Temuco	Gif3841	Charcoal	14C	670	80	Campbell & Quiroz 2015
Parcela Jacinto Aguilera	Choapa Valley	TP41	Ceramic	TL	670	130	Troncoso & Pavlovic 2013
VP3/A, R3i-6.137.5	Angostura micro region	UCTL2133	Ceramic	TL	670	70	Falabella et al 2015
RML 016 "Familia Luco"	Upper Aconcagua River	UCTL895	Ceramic	TL	675	60	Sanchez 2001
CK10/A, P8.2	Angostura micro region	UCTL2353	Ceramic	TL	680	60	Falabella et al 2015
El Mercurio	Santiago basin	UCTL269	Ceramic	TL	680	130	Sanhueza et al 2003
P12-1	Isla Mocha	Beta79918	Charcoal	14C	680	80	Campbell & Quiroz 2015
VP2/A, 8.c20.3	Angostura micro region	UCTL2178	Ceramic	TL	685	65	Falabella et al 2015
VP1/B, 21-cL	Angostura micro region	UCTL2117	Ceramic	TL	690	70	Falabella et al 2015
Chuchunco	Rancagua basin	UCTL1762	Ceramic	TL	695	130	Sanhueza et al 2006
VP2/A, 8.c14.4	Angostura micro region	UCTL2177	Ceramic	TL	695	65	Falabella et al 2015
CK7, P2.1	Angostura micro region	UCTL2301	Ceramic	TL	700	70	Falabella et al 2015
CK8/B, P12.3	Angostura micro region	UCTL2310	Ceramic	TL	700	70	Falabella et al 2015
P31-1	Isla Mocha	Beta95086	Charcoal	14C	700	50	Campbell & Quiroz 2015
VP1/C, 2-P4.3	Angostura micro region	UCTL2126	Ceramic	TL	700	70	Falabella et al 2015
CK7, P1.2	Angostura micro region	UCTL2300	Ceramic	TL	705	70	Falabella et al 2015
VP3/C, R3i-6.90.3	Angostura micro region	UCTL2141	Ceramic	TL	705	70	Falabella et al 2015
CK5/C2, P55.3	Angostura micro region	UCTL2346	Ceramic	TL	710	70	Falabella et al 2015
P31-1	Isla Mocha	Gd5902	Charcoal	14C	710	50	Campbell & Quiroz 2015
CK16, P4.3	Angostura micro region	UCTL2304	Ceramic	TL	715	55	Falabella et al 2015
P25-1	Isla Mocha	Beta132089	Charcoal	14C	720	80	Campbell & Quiroz 2015
Caracoles Abierto	Rancagua basin	UCTL1672	Ceramic	TL	730	120	Sanhueza et al 2006
Caracoles Abierto	Rancagua basin	UCTL1670	Ceramic	TL	730	100	Sanhueza et al 2006
RML 016 "Familia Luco"	Upper Aconcagua River	UCTL896	Ceramic	TL	735	50	Sanchez 2001
P5-1	Isla Mocha	Beta73674	Charcoal	14C	740	100	Campbell & Quiroz 2015
Plaza Coquimbo	Elqui Valley	TP92	N/A	14C	740	60	Troncoso & Pavlovic 2013
Puente Quilo	Quetalmahue	Beta156221	Charcoal	14C	740	50	Campbell & Quiroz 2015
Vacas I (Qu-11)	Concepción	N/A	N/A	14C	740	100	Campbell & Quiroz 2015
Bato 2	Choapa Valley	TP42	Ceramic	TL	745	100	Troncoso & Pavlovic 2013
Los Mellizos	Choapa Valley	TP43	Ceramic	TL	745	130	Troncoso & Pavlovic 2013
VP3/B, R3i-6.21.2	Angostura micro region	UCTL2138	Ceramic	TL	745	70	Falabella et al 2015
CK10/B, P13.3	Angostura micro region	UCTL2355	Ceramic	TL	750	70	Falabella et al 2015
La Palma E101/1	Santiago basin	UCTL1269	Ceramic	TL	750	100	Sanhueza et al 2003
P29-1	Isla Mocha	AA89418	Charcoal	14C	759	38	Campbell & Quiroz 2015
Paso Hondo 1	Choapa Valley	TP44	Ceramic	TL	760	120	Troncoso & Pavlovic 2013
Los Panales	Santiago basin	UCTL693	Ceramic	TL	765	100	Sanhueza et al 2003
RML 008 "Blanca Gutierrez" Sector 1	Upper Aconcagua River	UCTL625	Ceramic	TL	770	70	Sanchez 2001
CK2/S, G11.32.5	Angostura micro region	UCTL2221	Ceramic	TL	775	60	Falabella et al 2015
RML 004 "Cementerio Chicauma" Sector W	Upper Aconcagua River	UCTL710	Ceramic	TL	775	80	Sanchez 2001
CK5/B, cD	Angostura micro region	UCTL2323	Ceramic	TL	780	80	Falabella et al 2015
Pichicullín / PCH-3	Chanchan	Beta33316	Charcoal	14C	780	60	Campbell & Quiroz 2015
Pueblo Hundido	Rancagua basin	UCTL1815	Ceramic	TL	785	120	Sanhueza et al 2006
RML 008 "Blanca Gutierrez" Sector 1	Upper Aconcagua River	UCTL627	Ceramic	TL	785	80	Sanchez 2001
CK3/A3, G13.cM	Angostura micro region	UCTL2225	Ceramic	TL	790	80	Falabella et al 2015
Los Mellizos	Choapa Valley	TP71	N/A	14C	790	40	Troncoso & Pavlovic 2013
RML 017 "Sergio Parra"	Upper Aconcagua River	UCTL897	Ceramic	TL	790	70	Sanchez 2001
El Manzano 2	Santiago basin	UCTL1123	Ceramic	TL	795	120	Sanhueza et al 2003
Parcela Alejandro Manquez	Choapa Valley	TP45	Ceramic	TL	795	120	Troncoso & Pavlovic 2013
Punta Arenas	Concepción	N/A	N/A	14C	800	60	Campbell & Quiroz 2015
CK6, P14.1	Angostura micro region	UCTL2298	Ceramic	TL	805	50	Falabella et al 2015
El Mercurio	Santiago basin	UCTL988	Ceramic	TL	805	120	Sanhueza et al 2003
P25-1	Isla Mocha	Beta137969	Shell	14C	810	60	Campbell & Quiroz 2015
Pichicav_n 1	Choapa Valley	TP46	Ceramic	TL	810	110	Troncoso & Pavlovic 2013
Pichicav_n 1	Choapa Valley	TP47	Ceramic	TL	810	100	Troncoso & Pavlovic 2013
Tubul I-A (Tu-5) (RT-14)	Golfo de Arauco	IVIC846	Charcoal	14C	810	100	Campbell & Quiroz 2015
El Peuco	Rancagua basin	UCTL1668	Ceramic	TL	825	120	Sanhueza et al 2006
P29-1	Isla Mocha	AA89417	Charcoal	14C	825	36	Campbell & Quiroz 2015
Parcela Alejandro Manquez	Choapa Valley	TP48	Ceramic	TL	825	120	Troncoso & Pavlovic 2013
P31-1	Isla Mocha	AA89424	Charcoal	14C	826	27	Campbell & Quiroz 2015
Km 15 - Lof Mahuida	Temuco	A12241	N/A	14C	830	135	Campbell & Quiroz 2015
RML 008 "Blanca Gutierrez" Sector 2	Upper Aconcagua River	UCTL630	Ceramic	TL	830	80	Sanchez 2001
VP3/A, R3i-6.126.4	Angostura micro region	UCTL2134	Ceramic	TL	830	80	Falabella et al 2015
Pichicav_n 1	Choapa Valley	TP49	Ceramic	TL	835	95	Troncoso & Pavlovic 2013
VP1/B, 21-cL	Angostura micro region	UCTL2116	Ceramic	TL	835	80	Falabella et al 2015
VP1/B, 21-cL	Angostura micro region	UCTL2118	Ceramic	TL	835	80	Falabella et al 2015
Alero Paulino GonzaLlez	Choapa Valley	TP79	N/A	14C	840	35	Troncoso & Pavlovic 2013
CK2/N, G11.45.2	Angostura micro region	UCTL2217	Ceramic	TL	840	80	Falabella et al 2015
CK8/B, P12. 4	Angostura micro region	UCTL2309	Ceramic	TL	840	80	Falabella et al 2015
P31-1	Isla Mocha	Gd6428	Charcoal	14C	840	70	Campbell & Quiroz 2015
Pichicullín / PCH-5	Chanchan	Beta33317	Charcoal	14C	840	90	Campbell & Quiroz 2015
Punta Arenas	Concepción	N/A	N/A	14C	840	60	Campbell & Quiroz 2015
Parcela Alejandro Manquez	Choapa Valley	TP50	Ceramic	TL	845	110	Troncoso & Pavlovic 2013
RML 004 "Cementerio Chicauma" Sector W	Upper Aconcagua River	UCTL708	Ceramic	TL	845	85	Sanchez 2001
RML 015 "Familia Fernandez" Sector 1	Upper Aconcagua River	UCTL715	Ceramic	TL	845	80	Sanchez 2001
Hospital G16/1	Santiago basin	UCTL1228	Ceramic	TL	850	110	Sanhueza et al 2003
Huintil 5	Choapa Valley	TP119	Ceramic	TL	850	80	Troncoso & Pavlovic 2013
La Palma E101/1	Santiago basin	UCTL1270	Ceramic	TL	850	90	Sanhueza et al 2003
Los Mellizos	Choapa Valley	TP51	Ceramic	TL	850	90	Troncoso & Pavlovic 2013
CK15/B, cG	Angostura micro region	UCTL2372	Ceramic	TL	855	80	Falabella et al 2015
Pichicav_n 1	Choapa Valley	TP53	Ceramic	TL	855	110	Troncoso & Pavlovic 2013
Ranqui 4	Choapa Valley	TP52	Ceramic	TL	855	100	Troncoso & Pavlovic 2013
RML 017 "Sergio Parra"	Upper Aconcagua River	UCTL898	Ceramic	TL	855	90	Sanchez 2001
CK6, cA	Angostura micro region	UCTL2299	Ceramic	TL	860	80	Falabella et al 2015
El Membrillar 2	Concón	UCTL1776	Ceramic	TL	860	90	Avalos et al 2006
Manquehua 2	Choapa Valley	TP56	Ceramic	TL	860	100	Troncoso & Pavlovic 2013
RML 004 "Cementerio Chicauma" Sector E	Upper Aconcagua River	UCTL633	Ceramic	TL	860	85	Sanchez 2001
RML 008 "Blanca Gutierrez" Sector 1	Upper Aconcagua River	UCTL626	Ceramic	TL	860	70	Sanchez 2001
CK8/A, cZ	Angostura micro region	UCTL2308	Ceramic	TL	865	80	Falabella et al 2015
Parcela Alejandro Manquez	Choapa Valley	TP54	Ceramic	TL	865	110	Troncoso & Pavlovic 2013
P21-1	Isla Mocha	Beta162421	Charcoal	14C	870	60	Campbell & Quiroz 2015
VP2/B, 8.c6.2	Angostura micro region	UCTL2181	Ceramic	TL	870	80	Falabella et al 2015
Chuchunco	Rancagua basin	UCTL1765	Ceramic	TL	880	110	Sanhueza et al 2006
P25-1	Isla Mocha	Beta137970	Charcoal	14C	880	70	Campbell & Quiroz 2015
Parcela Alejandro Manquez	Choapa Valley	TP120	Ceramic	TL	880	110	Troncoso & Pavlovic 2013
RML 015 "Familia Fernandez" Sector 1	Upper Aconcagua River	UCTL713	Ceramic	TL	880	90	Sanchez 2001
CK5/A, P1.3	Angostura micro region	UCTL2342	Ceramic	TL	885	60	Falabella et al 2015
Las Pataguas	Maipo basin	N/A	Ceramic	TL	885	80	Falabella et al 2007
P25-1	Isla Mocha	Beta62819/CAMS14037	Charcoal	14C	890	70	Campbell & Quiroz 2015
VP3/A, R3i-6.129.4	Angostura micro region	UCTL2132	Ceramic	TL	890	100	Falabella et al 2015
P29-1	Isla Mocha	AA89416	Charcoal	14C	895	38	Campbell & Quiroz 2015
VP5/B, V-18.20.2	Angostura micro region	UCTL2174	Ceramic	TL	895	90	Falabella et al 2015
CK5/A, P1.2	Angostura micro region	UCTL2341	Ceramic	TL	900	90	Falabella et al 2015
El Peuco	Rancagua basin	UCTL1669	Ceramic	TL	900	110	Sanhueza et al 2006
P21-1	Isla Mocha	Beta181243	Charcoal	14C	900	60	Campbell & Quiroz 2015
P25-1	Isla Mocha	Beta114462	Charcoal	14C	900	80	Campbell & Quiroz 2015
Villa JMC-01	Temuco	Beta296450	Charcoal	14C	900	30	Campbell & Quiroz 2015
Chuchunco	Rancagua basin	UCTL1764	Ceramic	TL	905	100	Sanhueza et al 2006
El Membrillar 2	Concón	UCTL1777	Ceramic	TL	905	100	Avalos et al 2006
CH(MEP) E 64 "Cementerio El Bajo" (Melipilla)	Upper Aconcagua River	UCTL903	Ceramic	TL	910	70	Sanchez 2001
El Manzano 2	Santiago basin	UCTL1125	Ceramic	TL	910	110	Sanhueza et al 2003
P21-1	Isla Mocha	Beta69935	Charcoal	14C	910	70	Campbell & Quiroz 2015
Pueblo Hundido	Rancagua basin	UCTL1817	Ceramic	TL	910	100	Sanhueza et al 2006
SM-30	Isla Santa María	Beta237530	Charcoal	14C	910	40	Campbell & Quiroz 2015
SM-44	Isla Santa María	Beta237531	Bone	14C	910	40	Campbell & Quiroz 2015
RML 004 "Cementerio Chicauma" Sector W	Upper Aconcagua River	UCTL709	Ceramic	TL	915	90	Sanchez 2001
La Colonia 8	Choapa Valley	TP121	Ceramic	TL	920	110	Troncoso & Pavlovic 2013
Los Mellizos	Choapa Valley	TP72	N/A	14C	920	30	Troncoso & Pavlovic 2013
RML 018 "Jorge Ayala B"	Upper Aconcagua River	UCTL899	Ceramic	TL	920	90	Sanchez 2001
VP1/C, 2-P42.1	Angostura micro region	UCTL2127	Ceramic	TL	920	90	Falabella et al 2015
VP3/A, R3i-6.123.2	Angostura micro region	UCTL2135	Ceramic	TL	925	90	Falabella et al 2015
CK8/B, cM	Angostura micro region	UCTL2312	Ceramic	TL	930	90	Falabella et al 2015
CK8/B, P12.2	Angostura micro region	UCTL2311	Ceramic	TL	930	90	Falabella et al 2015
RML 004 "Cementerio Chicauma" Sector E	Upper Aconcagua River	UCTL632	Ceramic	TL	930	90	Sanchez 2001
RML 008 "Blanca Gutierrez" Sector 2	Upper Aconcagua River	UCTL629	Ceramic	TL	930	90	Sanchez 2001
Bato 1	Choapa Valley	TP55	Ceramic	TL	935	105	Troncoso & Pavlovic 2013
El Mercurio	Santiago basin	N/A	Ceramic	TL	935	100	Falabella et al 2007
El Mercurio	Santiago basin	UCTL272	Ceramic	TL	935	100	Sanhueza et al 2003
VP1/A, 21-cJ	Angostura micro region	UCTL2124	Ceramic	TL	940	95	Falabella et al 2015
CK2/N, G11.29.2	Angostura micro region	UCTL2220	Ceramic	TL	945	75	Falabella et al 2015
Las Burras 5	Choapa Valley	TP122	Ceramic	TL	945	100	Troncoso & Pavlovic 2013
RML 004 "Cementerio Chicauma" Sector W	Upper Aconcagua River	UCTL717	Ceramic	TL	945	100	Sanchez 2001
VP2/B, 8.c6.4	Angostura micro region	UCTL2179	Ceramic	TL	945	95	Falabella et al 2015
CK1/6, c6amp-R.7	Angostura micro region	UCTL2243	Ceramic	TL	950	60	Falabella et al 2015
RML 008 "Blanca Gutierrez" Sector 2	Upper Aconcagua River	UCTL628	Ceramic	TL	950	90	Sanchez 2001
EP, R.1. planta	Angostura micro region	UCTL1667	Ceramic	TL	960	85	Falabella et al 2015
Pueblo Hundido	Rancagua basin	UCTL1818	Ceramic	TL	960	100	Sanhueza et al 2006
VP1/C, 2-P36.3	Angostura micro region	UCTL2128	Ceramic	TL	960	100	Falabella et al 2015
P29-1	Isla Mocha	AA89419	Charcoal	14C	964	36	Campbell & Quiroz 2015
Quereo IV	Choapa Valley	TP73	N/A	14C	965	60	Troncoso & Pavlovic 2013
Independencia	Choapa Valley	TP123	Ceramic	TL	970	100	Troncoso & Pavlovic 2013
Lonquen E80/4	Santiago basin	UCTL1231	Ceramic	TL	970	100	Sanhueza et al 2003
CK5/B, cD	Angostura micro region	UCTL2326	Ceramic	TL	975	90	Falabella et al 2015
Cogoti	Limarí Valley	TP106	Ceramic	TL	975	100	Troncoso & Pavlovic 2013
Valle Chicauma (RML 004)	Maipo basin	N/A	Ceramic	TL	975	100	Falabella et al 2007
CK5/A, cA	Angostura micro region	UCTL2325	Ceramic	TL	980	90	Falabella et al 2015
VP1/B, 21-cM	Angostura micro region	UCTL2120	Ceramic	TL	980	100	Falabella et al 2015
VP2/C,8.P26.3	Angostura micro region	UCTL2183	Ceramic	TL	980	100	Falabella et al 2015
CK8/C, P42.2	Angostura micro region	UCTL2314	Ceramic	TL	990	90	Falabella et al 2015
Pichicav_n 1	Choapa Valley	TP57	Ceramic	TL	990	100	Troncoso & Pavlovic 2013
CK3/B2, G13.cF	Angostura micro region	UCTL2233	Ceramic	TL	995	90	Falabella et al 2015
Lonquen E80/4	Santiago basin	UCTL1229	Ceramic	TL	995	100	Sanhueza et al 2003
CK11/A, P25.6	Angostura micro region	UCTL2363	Ceramic	TL	1000	100	Falabella et al 2015
CK5/C1, P40.2	Angostura micro region	UCTL2344	Ceramic	TL	1005	100	Falabella et al 2015
VP5/A, V 18.12.1	Angostura micro region	UCTL2168	Ceramic	TL	1005	100	Falabella et al 2015
CK8/A, cZ	Angostura micro region	UCTL2307	Ceramic	TL	1010	100	Falabella et al 2015
Manquehua 4	Choapa Valley	TP58	Ceramic	TL	1010	90	Troncoso & Pavlovic 2013
VP1/A, 21-cD	Angostura micro region	UCTL2121	Ceramic	TL	1010	100	Falabella et al 2015
Chamico	Rancagua basin	UCTL1820	Ceramic	TL	1020	90	Sanhueza et al 2006
Chamico	Rancagua basin	UCTL1822	Ceramic	TL	1020	85	Sanhueza et al 2006
RML 004 "Cementerio Chicauma" Sector E	Upper Aconcagua River	UCTL635	Ceramic	TL	1020	100	Sanchez 2001
VP1/A, 21-cI	Angostura micro region	UCTL2123	Ceramic	TL	1025	100	Falabella et al 2015
CK2/S, G11.7.4	Angostura micro region	UCTL2224	Ceramic	TL	1030	100	Falabella et al 2015
Estadio Illapel	Choapa Valley	TP124	Ceramic	TL	1030	70	Troncoso & Pavlovic 2013
Independencia	Choapa Valley	TP125	Ceramic	TL	1030	95	Troncoso & Pavlovic 2013
Parcela Alejandro Manquez	Choapa Valley	TP78	N/A	14C	1030	30	Troncoso & Pavlovic 2013
CK8/C, P47.2	Angostura micro region	UCTL2313	Ceramic	TL	1035	100	Falabella et al 2015
RML 015 "Familia Fernandez" Sector 1	Upper Aconcagua River	UCTL716	Ceramic	TL	1035	80	Sanchez 2001
El Peuco	Rancagua basin	UCTL1667	Ceramic	TL	1040	85	Sanhueza et al 2006
RML 015 "Familia Fernandez" Sector 2	Upper Aconcagua River	UCTL714	Ceramic	TL	1040	100	Sanchez 2001
VP4, 23.T2.1	Angostura micro region	UCTL2159	Ceramic	TL	1040	100	Falabella et al 2015
Cia Telefonos	Elqui Valley	TP93	N/A	14C	1045	95	Troncoso & Pavlovic 2013
Parcela Alejandro Manquez	Choapa Valley	TP126	Ceramic	TL	1050	80	Troncoso & Pavlovic 2013
RML 004 "Cementerio Chicauma" Sector E	Upper Aconcagua River	UCTL634	Ceramic	TL	1050	100	Sanchez 2001
RML 015 "Familia Fernandez" Sector 1	Upper Aconcagua River	UCTL712	Ceramic	TL	1050	90	Sanchez 2001
RML 018 "Jorge Ayala A"	Upper Aconcagua River	UCTL900	Ceramic	TL	1050	100	Sanchez 2001
VP5/A, V-18.9.5	Angostura micro region	UCTL2167	Ceramic	TL	1050	100	Falabella et al 2015
San Julian	Limarí Valley	TP107	Ceramic	TL	1055	95	Troncoso & Pavlovic 2013
CK2/S, G11.12.3	Angostura micro region	UCTL2223	Ceramic	TL	1060	100	Falabella et al 2015
CK3/A3, G13.cN	Angostura micro region	UCTL2226	Ceramic	TL	1060	100	Falabella et al 2015
Villa JMC-01	Temuco	Beta241265	Charcoal	14C	1060	40	Campbell & Quiroz 2015
VP3/A, R3i-6.134.2	Angostura micro region	UCTL2131	Ceramic	TL	1060	100	Falabella et al 2015
LV065	Choapa Valley	TP59	Ceramic	TL	1065	100	Troncoso & Pavlovic 2013
Estadio	Choapa Valley	TP127	Ceramic	TL	1070	90	Troncoso & Pavlovic 2013
LV065	Choapa Valley	TP60	Ceramic	TL	1070	95	Troncoso & Pavlovic 2013
Playa Negra 1	Colico-Caburgua	Beta227246	Charcoal	14C	1070	40	Campbell & Quiroz 2015
San Julian	Limarí Valley	TP108	Ceramic	TL	1075	90	Troncoso & Pavlovic 2013
VP2/B, 8.c6.4	Angostura micro region	UCTL2180	Ceramic	TL	1075	55	Falabella et al 2015
El Mercurio	Santiago basin	N/A	Ceramic	TL	1080	90	Falabella et al 2007
El Mercurio	Santiago basin	UCTL271	Ceramic	TL	1080	90	Sanhueza et al 2003
Los Zorros	Combarbalá Valley	TP16	N/A	14C	1080	60	Troncoso & Pavlovic 2013
Villarrica W10	Villarrica	Beta273151	N/A	14C	1080	40	Campbell & Quiroz 2015
VP5/B, V-20-cN	Angostura micro region	UCTL2175	Ceramic	TL	1080	110	Falabella et al 2015
Cesped 1	Choapa Valley	TP128	Ceramic	TL	1085	95	Troncoso & Pavlovic 2013
Tejas Verdes 4	Coastal Maipo basin	AA64988	Bone collagen	14C	1085	33	Falabella et al 2007
CK4, G5. cA	Angostura micro region	UCTL2239	Ceramic	TL	1090	100	Falabella et al 2015
CK7, P2.1	Angostura micro region	UCTL2302	Ceramic	TL	1090	100	Falabella et al 2015
El Membrillar 2	Concón	UCTL1779	Ceramic	TL	1090	100	Avalos et al 2006
El Tome 1	Choapa Valley	TP61	Ceramic	TL	1090	90	Troncoso & Pavlovic 2013
Lonquen	Maipo basin	AA68048	Bone collagen	14C	1091	46	Falabella et al 2007
Montículo Norte	Isla Mocha	AA89415	Charcoal	14C	1096	37	Campbell & Quiroz 2015
Alero Cabeza de Indio 1	Melipeuco	Beta241264	Charcoal	14C	1100	40	Campbell & Quiroz 2015
EP, U10.1 b	Angostura micro region	UCTL1669	Ceramic	TL	1100	110	Falabella et al 2015
Lu-11	Puren-Lumaco	Beta168999	Charcoal	14C	1100	80	Campbell & Quiroz 2015
Lu-23. Gundermankuel	Puren-Lumaco	Beta68999	Charcoal	14C	1100	80	Campbell & Quiroz 2015
VP1/A, 21-cG	Angostura micro region	UCTL2122	Ceramic	TL	1100	110	Falabella et al 2015
P29-1	Isla Mocha	AA89420	Charcoal	14C	1105	36	Campbell & Quiroz 2015
CK3/B1, G13.cH	Angostura micro region	UCTL2230	Ceramic	TL	1110	100	Falabella et al 2015
Km 20 - Licanco Chico	Temuco	A12240	N/A	14C	1110	60	Campbell & Quiroz 2015
LV039	Choapa Valley	TP62	Ceramic	TL	1110	50	Troncoso & Pavlovic 2013
Pichicav_n 1	Choapa Valley	TP75	N/A	14C	1110	20	Troncoso & Pavlovic 2013
CK2/N, G11.22.4	Angostura micro region	UCTL2218	Ceramic	TL	1115	90	Falabella et al 2015
CK15/A, cF	Angostura micro region	UCTL2371	Ceramic	TL	1120	100	Falabella et al 2015
CK3/B2, G13.cF	Angostura micro region	UCTL2234	Ceramic	TL	1120	110	Falabella et al 2015
CK5/A, cB	Angostura micro region	UCTL2324	Ceramic	TL	1120	100	Falabella et al 2015
CK8/A, P10.2	Angostura micro region	UCTL2306	Ceramic	TL	1120	100	Falabella et al 2015
Estadio	Choapa Valley	TP129	Ceramic	TL	1120	80	Troncoso & Pavlovic 2013
San Julian	Limarí Valley	TP109	Ceramic	TL	1120	70	Troncoso & Pavlovic 2013
VP1/C, 2-P39.1	Angostura micro region	UCTL2130	Ceramic	TL	1125	110	Falabella et al 2015
Caracoles Abierto	Rancagua basin	UCTL1664	Ceramic	TL	1130	70	Sanhueza et al 2006
CK15/A, cD	Angostura micro region	UCTL2368	Ceramic	TL	1130	110	Falabella et al 2015
Cogoti	Limarí Valley	TP110	Ceramic	TL	1130	60	Troncoso & Pavlovic 2013
El Membrillar 1	Concón	UCTL1782	Ceramic	TL	1135	120	Avalos et al 2006
Las Burras 7	Choapa Valley	TP130	Ceramic	TL	1150	90	Troncoso & Pavlovic 2013
Cunlagua 6	Choapa Valley	TP63	Ceramic	TL	1155	50	Troncoso & Pavlovic 2013
CK3/B1, G13.cG	Angostura micro region	UCTL2228	Ceramic	TL	1160	110	Falabella et al 2015
LV039	Choapa Valley	TP131	Ceramic	TL	1160	50	Troncoso & Pavlovic 2013
Cesped 1	Choapa Valley	TP132	Ceramic	TL	1165	50	Troncoso & Pavlovic 2013
Huintil 5	Choapa Valley	TP133	Ceramic	TL	1165	50	Troncoso & Pavlovic 2013
Palmilla 2	Choapa Valley	TP64	Ceramic	TL	1165	80	Troncoso & Pavlovic 2013
Country Club	Santiago basin	AA68049	Bone collagen	14C	1169	46	Falabella et al 2007
El Tome 13	Choapa Valley	TP65	Ceramic	TL	1170	80	Troncoso & Pavlovic 2013
Cesped 1	Choapa Valley	TP134	Ceramic	TL	1175	100	Troncoso & Pavlovic 2013
EP, U3 Amp w. R.1b	Angostura micro region	UCTL1668	Ceramic	TL	1175	120	Falabella et al 2015
CK4, G5.P.B.4	Angostura micro region	UCTL2237	Ceramic	TL	1180	100	Falabella et al 2015
CLB020	Combarbalá Valley	TP18	Ceramic	TL	1190	120	Troncoso & Pavlovic 2013
Sta Virginia 3	Choapa Valley	TP135	Ceramic	TL	1190	70	Troncoso & Pavlovic 2013
P22-1	Isla Mocha	Beta71646	Charcoal	14C	1200	140	Campbell & Quiroz 2015
PichicaveLn 1	Choapa Valley	TP76	N/A	14C	1200	40	Troncoso & Pavlovic 2013
CK8/C, P37.3	Angostura micro region	UCTL2315	Ceramic	TL	1205	120	Falabella et al 2015
Cogoti	Limarí Valley	TP111	Ceramic	TL	1205	80	Troncoso & Pavlovic 2013
P5-1	Isla Mocha	Beta73675	Charcoal	14C	1210	110	Campbell & Quiroz 2015
Parcela Alejandro Manquez	Choapa Valley	TP136	Ceramic	TL	1210	80	Troncoso & Pavlovic 2013
Pueblo Hundido	Rancagua basin	UCTL1816	Ceramic	TL	1210	80	Sanhueza et al 2006
VP4, 23.P5.2	Angostura micro region	UCTL2160	Ceramic	TL	1215	120	Falabella et al 2015
El Membrillar 2	Concón	UCTL1775	Ceramic	TL	1230	120	Avalos et al 2006
Paso Agricola	Cachapoal basin	AA64986	Bone collagen	14C	1234	52	Falabella et al 2007
LV181	Choapa Valley	TP137	Ceramic	TL	1240	50	Troncoso & Pavlovic 2013
Uruguay	Choapa Valley	TP138	Ceramic	TL	1240	70	Troncoso & Pavlovic 2013
Caracoles Abierto	Rancagua basin	UCTL1663	Ceramic	TL	1250	60	Sanhueza et al 2006
CK11/B, P35.4	Angostura micro region	UCTL2364	Ceramic	TL	1250	120	Falabella et al 2015
Lucuman 8	Choapa Valley	TP139	Ceramic	TL	1250	70	Troncoso & Pavlovic 2013
El Membrillar 2	Concón	UCTL1781	Ceramic	TL	1255	120	Avalos et al 2006
Las Burras 2	Choapa Valley	TP140	Ceramic	TL	1255	85	Troncoso & Pavlovic 2013
Loma El Arenal	Choapa Valley	TP141	Ceramic	TL	1255	75	Troncoso & Pavlovic 2013
CK11/A, P12.6	Angostura micro region	UCTL2361	Ceramic	TL	1260	120	Falabella et al 2015
Loma El Arenal	Choapa Valley	TP142	Ceramic	TL	1270	70	Troncoso & Pavlovic 2013
Camisas 6	Choapa Valley	TP67	Ceramic	TL	1280	60	Troncoso & Pavlovic 2013
CK3/C, G16.cC	Angostura micro region	UCTL2235	Ceramic	TL	1280	90	Falabella et al 2015
Cunlagua 3	Choapa Valley	TP66	Ceramic	TL	1280	70	Troncoso & Pavlovic 2013
CK10/B, P38.1	Angostura micro region	UCTL2357	Ceramic	TL	1290	130	Falabella et al 2015
Huimpil	Galvarino-Lautaro	Gif4984	Charcoal	14C	1290	80	Campbell & Quiroz 2015
VP2/C, 8.P31.3	Angostura micro region	UCTL2182	Ceramic	TL	1290	130	Falabella et al 2015
Huintil 4	Choapa Valley	TP143	Ceramic	TL	1295	50	Troncoso & Pavlovic 2013
CK15/B, cH	Angostura micro region	UCTL2373	Ceramic	TL	1300	130	Falabella et al 2015
San Julian	Limarí Valley	TP112	Ceramic	TL	1300	70	Troncoso & Pavlovic 2013
VP3/C, R3i-6.99.3	Angostura micro region	UCTL2142	Ceramic	TL	1305	130	Falabella et al 2015
CK11/B, P35.6	Angostura micro region	UCTL2365	Ceramic	TL	1310	130	Falabella et al 2015
El Tom_ 8	Choapa Valley	TP68	Ceramic	TL	1310	65	Troncoso & Pavlovic 2013
Pu-165	Puren-Lumaco	AA13772	Charcoal	14C	1315	50	Campbell & Quiroz 2015
Cogoti	Limarí Valley	TP113	Ceramic	TL	1320	100	Troncoso & Pavlovic 2013
Pichicav_n 1	Choapa Valley	TP74	N/A	14C	1320	35	Troncoso & Pavlovic 2013
VP5/B, V-20 P27.3	Angostura micro region	UCTL2172	Ceramic	TL	1320	130	Falabella et al 2015
CK1/8-9, c9.1	Angostura micro region	UCTL1108	Ceramic	TL	1325	130	Falabella et al 2015
Chamico	Rancagua basin	UCTL1821	Ceramic	TL	1335	55	Sanhueza et al 2006
CK10/B, P40.3	Angostura micro region	UCTL2359	Ceramic	TL	1335	130	Falabella et al 2015
EP, U4-R1. planta	Angostura micro region	UCTL1666	Ceramic	TL	1350	110	Falabella et al 2015
Pisco Control Salamanca	Choapa Valley	TP144	Ceramic	TL	1350	65	Troncoso & Pavlovic 2013
Chal Chal 3	Choapa Valley	TP145	Ceramic	TL	1360	60	Troncoso & Pavlovic 2013
Lucuman 8	Choapa Valley	TP146	Ceramic	TL	1370	60	Troncoso & Pavlovic 2013
Hospital 8-9	Maipo basin	AA68050	Bone collagen	14C	1380	46	Falabella et al 2007
VP3/C, R3i-6.93.3	Angostura micro region	UCTL2140	Ceramic	TL	1380	135	Falabella et al 2015
Cogoti	Limarí Valley	TP114	Ceramic	TL	1390	80	Troncoso & Pavlovic 2013
CK9/A, cB	Angostura micro region	UCTL2317	Ceramic	TL	1400	140	Falabella et al 2015
Cancha de Golf	Coastal Maipo basin	AA63823	Bone collagen	14C	1405	47	Falabella et al 2007
Línea 5 Metro	Santiago basin	N/A	Ceramic	TL	1405	60	Falabella et al 2007
Cogoti	Limarí Valley	TP116	Ceramic	TL	1410	60	Troncoso & Pavlovic 2013
CK1/7, c7amp.7	Angostura micro region	UCTL2246	Ceramic	TL	1420	140	Falabella et al 2015
Cogoti	Limarí Valley	TP115	Ceramic	TL	1420	50	Troncoso & Pavlovic 2013
Ranqui 4	Choapa Valley	TP69	Ceramic	TL	1420	60	Troncoso & Pavlovic 2013
VP3/C, R3i-6.101.2	Angostura micro region	UCTL2139	Ceramic	TL	1425	140	Falabella et al 2015
Cogoti	Limarí Valley	TP117	Ceramic	TL	1430	50	Troncoso & Pavlovic 2013
VP2/C, 8.P25.5	Angostura micro region	UCTL2184	Ceramic	TL	1430	140	Falabella et al 2015
VP5/A, V-18.8.5	Angostura micro region	UCTL2170	Ceramic	TL	1430	140	Falabella et al 2015
CK1/6, c6amp-R.6	Angostura micro region	UCTL1110	Ceramic	TL	1435	130	Falabella et al 2015
CK1/7, c7amp.5	Angostura micro region	UCTL1109	Ceramic	TL	1440	150	Falabella et al 2015
CK4, G5. cB	Angostura micro region	UCTL2240	Ceramic	TL	1445	140	Falabella et al 2015
CK3/B1, G13.cH	Angostura micro region	UCTL2229	Ceramic	TL	1450	140	Falabella et al 2015
CK9/B, cC	Angostura micro region	UCTL2322	Ceramic	TL	1450	140	Falabella et al 2015
RML 004 "Cementerio Chicauma" Sector E	Upper Aconcagua River	UCTL631	Ceramic	TL	1450	150	Sanchez 2001
CK1/6, c6r.6	Angostura micro region	UCTL2242	Ceramic	TL	1460	100	Falabella et al 2015
Línea 5 Metro	Santiago basin	N/A	Ceramic	TL	1470	50	Falabella et al 2007
CK10/B, P39.2	Angostura micro region	UCTL2358	Ceramic	TL	1475	140	Falabella et al 2015
Línea 5 Metro	Santiago basin	N/A	Ceramic	TL	1475	50	Falabella et al 2007
SM-39	Isla Santa María	Beta310949	Bone	14C	1480	30	Campbell & Quiroz 2015
CK18, P15.1	Angostura micro region	UCTL2367	Ceramic	TL	1485	140	Falabella et al 2015
Línea 5 Metro	Santiago basin	N/A	Ceramic	TL	1485	55	Falabella et al 2007
Línea 5 Metro	Santiago basin	N/A	Ceramic	TL	1485	55	Falabella et al 2007
PichicaveLn 1	Choapa Valley	TP77	N/A	14C	1490	40	Troncoso & Pavlovic 2013
San Julian	Limarí Valley	TP118	Ceramic	TL	1490	40	Troncoso & Pavlovic 2013
CK2/N, G11.49.1	Angostura micro region	UCTL2219	Ceramic	TL	1495	90	Falabella et al 2015
Línea 5 Metro	Santiago basin	N/A	Ceramic	TL	1495	50	Falabella et al 2007
CK1/8-9, c8.3	Angostura micro region	UCTL2248	Ceramic	TL	1510	150	Falabella et al 2015
VP3/D, R3i-6.30.2	Angostura micro region	UCTL2157	Ceramic	TL	1510	160	Falabella et al 2015
Cipreses (alero)	Rancagua basin	UCTL1662	Ceramic	TL	1540	40	Sanhueza et al 2006
VP3/D, R3i-6.30.2	Angostura micro region	UCTL2144	Ceramic	TL	1540	150	Falabella et al 2015
VP5/A, V-18.15.1	Angostura micro region	UCTL2352	Ceramic	TL	1540	150	Falabella et al 2015
Batuco 2	Choapa Valley	TP70	Ceramic	TL	1550	30	Troncoso & Pavlovic 2013
SM-39	Isla Santa María	Beta310947	Bone	14C	1550	30	Campbell & Quiroz 2015
VP3/B, R3i-6.10.1	Angostura micro region	UCTL2136	Ceramic	TL	1555	150	Falabella et al 2015
CK9/A, cA	Angostura micro region	UCTL2319	Ceramic	TL	1565	150	Falabella et al 2015
CK9/B, cC	Angostura micro region	UCTL2316	Ceramic	TL	1565	150	Falabella et al 2015
VP3/D, R.31-6.40.3	Angostura micro region	UCTL2158	Ceramic	TL	1570	100	Falabella et al 2015
CK1/6, c6-sec B.3	Angostura micro region	UCTL2241	Ceramic	TL	1580	140	Falabella et al 2015
SM-39	Isla Santa María	Beta310948	Bone	14C	1580	30	Campbell & Quiroz 2015
CK5/C2, P55.2	Angostura micro region	UCTL2347	Ceramic	TL	1590	150	Falabella et al 2015
CK9/A, P17.1	Angostura micro region	UCTL2318	Ceramic	TL	1590	60	Falabella et al 2015
La Olla	Combarbalá Valley	TP20	N/A	14C	1590	120	Troncoso & Pavlovic 2013
CK9/A, P12.4	Angostura micro region	UCTL2320	Ceramic	TL	1600	160	Falabella et al 2015
VP1/A, 21-cE	Angostura micro region	UCTL2125	Ceramic	TL	1600	160	Falabella et al 2015
El Membrillar 2	Concón	UCTL1780	Ceramic	TL	1610	160	Avalos et al 2006
Pu-165	Puren-Lumaco	AA64657	Charcoal	14C	1615	40	Campbell & Quiroz 2015
CK10/B, P12.2	Angostura micro region	UCTL2354	Ceramic	TL	1620	100	Falabella et al 2015
CBL020	Combarbalá Valley	TP17	N/A	14C	1630	40	Troncoso & Pavlovic 2013
CK1/8-9, c9.2	Angostura micro region	UCTL2249	Ceramic	TL	1650	160	Falabella et al 2015
VP1/B, 21-cM	Angostura micro region	UCTL2119	Ceramic	TL	1650	160	Falabella et al 2015
Pu-165	Puren-Lumaco	AA64651	Charcoal	14C	1680	40	Campbell & Quiroz 2015
SM-39	Isla Santa María	Beta269491	Bone	14C	1700	40	Campbell & Quiroz 2015
Tilgo	Elqui Valley	TP1	N/A	14C	1705	95	Troncoso & Pavlovic 2013
Valle El Encanto	Limari Valley	TP2	N/A	14C	1710	95	Troncoso & Pavlovic 2013
Pu-165	Puren-Lumaco	AA64980	Charcoal	14C	1715	60	Campbell & Quiroz 2015
CK3/C, G16. cCa	Angostura micro region	UCTL2236	Ceramic	TL	1730	170	Falabella et al 2015
Lu-69. Tren Trenkuel	Puren-Lumaco	AA64653	Charcoal	14C	1730	40	Campbell & Quiroz 2015
SM-39	Isla Santa María	Beta269489	Charcoal	14C	1730	40	Campbell & Quiroz 2015
Pu-165	Puren-Lumaco	AA64645	Charcoal	14C	1735	40	Campbell & Quiroz 2015
CK3/B1, G13.cG	Angostura micro region	UCTL2227	Ceramic	TL	1740	100	Falabella et al 2015
CK4, G5. cA	Angostura micro region	UCTL2238	Ceramic	TL	1740	170	Falabella et al 2015
Pu-165	Puren-Lumaco	AA64655	Charcoal	14C	1740	35	Campbell & Quiroz 2015
VP5/B, V-18.16.4	Angostura micro region	UCTL2173	Ceramic	TL	1740	170	Falabella et al 2015
Laguna Huairavos	Isla Mocha	Beta62523	Charcoal	14C	1760	80	Campbell & Quiroz 2015
P25-1	Isla Mocha	Gd10007	Charcoal	14C	1760	130	Campbell & Quiroz 2015
Lu-69. Tren Trenkuel	Puren-Lumaco	AA64642	Charcoal	14C	1780	35	Campbell & Quiroz 2015
Pu-165	Puren-Lumaco	AA64979	Charcoal	14C	1780	40	Campbell & Quiroz 2015
CK1/7, c7amp.5a	Angostura micro region	UCTL2245	Ceramic	TL	1800	180	Falabella et al 2015
CK3/B2, G13.cF	Angostura micro region	UCTL2232	Ceramic	TL	1800	180	Falabella et al 2015
Pu-165	Puren-Lumaco	AA64647	Charcoal	14C	1800	40	Campbell & Quiroz 2015
CK15/A, cE	Angostura micro region	UCTL2370	Ceramic	TL	1810	180	Falabella et al 2015
Pu-165	Puren-Lumaco	AA13780	Charcoal	14C	1810	90	Campbell & Quiroz 2015
CK1/8-9, c8.2	Angostura micro region	UCTL2247	Ceramic	TL	1820	130	Falabella et al 2015
CK3/B2, G13.cD	Angostura micro region	UCTL2231	Ceramic	TL	1825	180	Falabella et al 2015
Alero Cabeza de Indio 1	Melipeuco	Beta253959	Charcoal	14C	1830	40	Campbell & Quiroz 2015
CK1/7, c7amp.2	Angostura micro region	UCTL2244	Ceramic	TL	1830	100	Falabella et al 2015
VP3/D, R3i-6.51.3	Angostura micro region	UCTL2145	Ceramic	TL	1830	180	Falabella et al 2015
Monkul-1	Puerto Saavedra	GrN16321	Charcoal	14C	1840	160	Campbell & Quiroz 2015
Pu-165	Puren-Lumaco	AA64652	Charcoal	14C	1845	40	Campbell & Quiroz 2015
VP3/D, R3i-6.30.3	Angostura micro region	UCTL2143	Ceramic	TL	1845	185	Falabella et al 2015
Lu-69. Tren Trenkuel	Puren-Lumaco	AA64977	Charcoal	14C	1850	35	Campbell & Quiroz 2015
SM-39	Isla Santa María	Beta269490	Bone	14C	1850	40	Campbell & Quiroz 2015
SM-39	Isla Santa María	Beta310945	Bone	14C	1850	30	Campbell & Quiroz 2015
CK5/B, P19.5	Angostura micro region	UCTL2340	Ceramic	TL	1860	180	Falabella et al 2015
CK9/B, cC	Angostura micro region	UCTL2321	Ceramic	TL	1860	180	Falabella et al 2015
Le-1 (Co II) (Conchal El Tumulo)	Cañete-Lebu	Beta121445	Shell	14C	1860	60	Campbell & Quiroz 2015
CK8/A, P22.2	Angostura micro region	UCTL2305	Ceramic	TL	1875	150	Falabella et al 2015
Monkul-1	Puerto Saavedra	GrN16323	Charcoal	14C	1900	70	Campbell & Quiroz 2015
CK15/A, cD	Angostura micro region	UCTL2369	Ceramic	TL	1925	190	Falabella et al 2015
Lu-69. Tren Trenkuel	Puren-Lumaco	AA64641	Charcoal	14C	1930	40	Campbell & Quiroz 2015
P25-1	Isla Mocha	Gd9197	Charcoal	14C	1940	180	Campbell & Quiroz 2015
CK2/S, G11.13.5	Angostura micro region	UCTL2222	Ceramic	TL	1960	190	Falabella et al 2015
Lenka Franulic	Cachapoal basin	AA63824	Bone collagen	14C	1997	56	Falabella et al 2007
Monkul-1	Puerto Saavedra	GrN16322	Charcoal	14C	2000	80	Campbell & Quiroz 2015
Pu-165	Puren-Lumaco	AA64646	Charcoal	14C	2010	40	Campbell & Quiroz 2015
Alero Quillen 1	Galvarino-Lautaro	Beta4709	Charcoal	14C	2030	70	Campbell & Quiroz 2015
VP5/A, V 18.17.5	Angostura micro region	UCTL2169	Ceramic	TL	2050	200	Falabella et al 2015
VP5/B, V-18.5.3	Angostura micro region	UCTL2171	Ceramic	TL	2055	145	Falabella et al 2015
Flor del Lago-1	Villarrica	Beta273148	N/A	14C	2080	40	Campbell & Quiroz 2015
Pu-166. Kuifikuel	Puren-Lumaco	AA64978	Charcoal	14C	2080	55	Campbell & Quiroz 2015
Estero Chaula (10PM006)	Reloncaví	N/A	Charcoal	14C	2085	65	Campbell & Quiroz 2015
Flor del Lago-1	Villarrica	Beta253960	Charcoal	14C	2110	40	Campbell & Quiroz 2015
Pu-166. Kuifikuel	Puren-Lumaco	AA64656	Charcoal	14C	2175	40	Campbell & Quiroz 2015
Valle Verde	Cachapoal basin	Beta213488	Bone collagen	14C	2180	40	Falabella et al 2007
CK15/B, cI	Angostura micro region	UCTL2374	Ceramic	TL	2185	200	Falabella et al 2015
Pichipehuenco-2	Galletué-Liucura	Beta273150	N/A	14C	2190	40	Campbell & Quiroz 2015
Pu-166. Kuifikuel	Puren-Lumaco	AA64649	Charcoal	14C	2200	40	Campbell & Quiroz 2015
Panitao Bajo	Reloncaví	Beta154617	Charcoal	14C	2210	60	Campbell & Quiroz 2015
Los Resfalines 1	Calafquén	Beta201397	Charcoal	14C	2220	40	Campbell & Quiroz 2015
Valle Verde	Cachapoal basin	Beta211328	Bone collagen	14C	2220	40	Falabella et al 2007
Panitao Bajo	Reloncaví	Beta140445	Shell	14C	2340	70	Campbell & Quiroz 2015
Monkul-1	Puerto Saavedra	GrN16324	Shell	14C	2440	60	Campbell & Quiroz 2015
Pu-220. Maicoyakuel	Puren-Lumaco	Beta167557	Charcoal	14C	2520	40	Campbell & Quiroz 2015
Le-4	Cañete-Lebu	Beta121446	Shell	14C	2530	60	Campbell & Quiroz 2015
Pu-165	Puren-Lumaco	AA64658	Charcoal	14C	2530	40	Campbell & Quiroz 2015
San Pedro Viejo de Pichasca	Limarí Valley	TP15	N/A	14C	2565	75	Troncoso & Pavlovic 2013
Monkul-1	Puerto Saavedra	GrN16325	Shell	14C	2630	60	Campbell & Quiroz 2015
San Pedro Viejo de Pichasca	Limarí Valley	TP14	N/A	14C	2670	60	Troncoso & Pavlovic 2013
Pu-166. Kuifikuel	Puren-Lumaco	AA64650	Charcoal	14C	2720	40	Campbell & Quiroz 2015
Pu-166. Kuifikuel	Puren-Lumaco	AA64648	Charcoal	14C	2735	55	Campbell & Quiroz 2015
Camping Las Pampitas (10PM005)	Reloncaví	N/A	Charcoal	14C	2795	135	Campbell & Quiroz 2015
P27-1	Isla Mocha	Beta71647/CAMS13062	Charcoal	14C	3220	50	Campbell & Quiroz 2015
P30-1	Isla Mocha	Gd4884	Charcoal	14C	3270	120	Campbell & Quiroz 2015
P30-1	Isla Mocha	Beta57810/CAMS5348	Charcoal	14C	3280	60	Campbell & Quiroz 2015

## Sheet: Metalloids paleopullotion Index
Supplemental Data 1
Article title: Geohistorical records of the Anthropocene in Chile
Eugenia M. Gayo1,2,3*, Virginia B. McRostie4, Roberto Campbell4, Carola Flores1,5, Antonio Maldonado5,6, Mauricio Uribe-Rodriguez7, Patricio I. Moreno1,8, Calogero M. Santoro9, Duncan A. Christie1,10, Ariel A. Muñoz1,11, Laura Gallardo1,12
1 Center for Climate and Resilience Research (CR2, FONDAP 15110009), Chile, 2 Laboratory for Stable Isotope Biogeochemistry, Departamento de Oceanografía, Universidad de Concepción, Concepción, Chile, 3 Center of Applied Ecology and Sustainability (CAPES), 4 Programa de Antropología, Instituto de Sociología, Pontificia Universidad Católica de Chile, Santiago, Chile, 5 Centro de Estudios Avanzados…
Dataset 3: Time-series for the paleopollution index that describes the temporal evolution of anthropogenic emissions of heavy metal (Hg, Pb, Cu and Ag) in northern Chile over the past 3,150 cal yrs BP.
Details for the calculation of the paleopaleopullution index are presented in Text S2 (Supplemental Material 1)
Year AD	Age (cal yrs BP)	Paleopollution index
2005	-55	0.584345
1995	-45	0.505979
1985	-35	0.539445
1975	-25	0.643921
1925	25	0.35347
1875	75	0.266374
1825	125	0.236146
1775	175	0.39232
1725	225	0.262587
1675	275	0.283689
1625	325	0.276631
1575	375	0.342882
1525	425	0.255121
1475	475	0.28744
1425	525	0.211716
1375	575	0.15584
1325	625	0.151599
1275	675	0.125684
1225	725	0.111799
1175	775	0.160734
1125	825	0.152939
1075	875	0.118705
1025	925	0.0983943
975	975	0.0704729
925	1025	0.0590403
875	1075	0.0674205
825	1125	0.111307
775	1175	0.0931432
725	1225	0.0975626
675	1275	0.071048
625	1325	0.0524719
575	1375	0.0399123
525	1425	0.031017
475	1475	0.0212307
425	1525	0.0147995
375	1575	0.0102151
325	1625	0.0178243
275	1675	0.0135945
225	1725	0.0263432
175	1775	0.0212249
125	1825	0.0252519
75	1875	0.0384283
25	1925	0.0300803
-25	1975	0.0317401
-75	2025	0.0567974
-125	2075	0.0583029
-175	2125	0.0337486
-225	2175	0.0228494
-275	2225	0.036667
-325	2275	0.0223254
-375	2325	0.0332429
-425	2375	0.039784
-475	2425	0.0735209
-525	2475	0.0459418
-575	2525	0.0561427
-625	2575	0.0685277
-675	2625	0.0563519
-725	2675	0.038621
-775	2725	0.0282634
-825	2775	0.0203424
-875	2825	0.0186542
-925	2875	0.0227863
-975	2925	0.0280176
-1025	2975	0.0201877
-1075	3025	0.0200988
-1125	3075	0.0282853
-1175	3125	0.0341125

## Sheet: Paleofire Index
Supplemental Data 1
Article title: Geohistorical records of the Anthropocene in Chile
Eugenia M. Gayo1,2,3*, Virginia B. McRostie4, Roberto Campbell4, Carola Flores1,5, Antonio Maldonado5,6, Mauricio Uribe-Rodriguez7, Patricio I. Moreno1,8, Calogero M. Santoro9, Duncan A. Christie1,10, Ariel A. Muñoz1,11, Laura Gallardo1,12
1 Center for Climate and Resilience Research (CR2, FONDAP 15110009), Chile, 2 Laboratory for Stable Isotope Biogeochemistry, Departamento de Oceanografía, Universidad de Concepción, Concepción, Chile, 3 Center of Applied Ecology and Sustainability (CAPES), 4 Programa de Antropología, Instituto de Sociología, Pontificia Universidad Católica de Chile, Santiago, Chile, 5 Centro de Estudios Avanzados…
Dataset 4: Time-series for the paleofire index that describes the fire activity in the Mediterranean-central Chile (33°-34°S) over the past 3,500 cal yrs BP.
Details for the calculation of the paleofire index are presented in Text S2 (Supplemental Material 1)
Year AD	Age (cal yrs BP)	Paleofire index
1950	0	0.777465
1850	100	0.232686
1750	200	0.376194
1650	300	0.490315
1550	400	0.263468
1450	500	0.172796
1350	600	0.158155
1250	700	0.159317
1150	800	0.242196
1050	900	0.338555
950	1000	0.374562
850	1100	0.354224
750	1200	0.437408
650	1300	0.413407
550	1400	0.321586
450	1500	0.327033
350	1600	0.345244
250	1700	0.396631
150	1800	0.386694
50	1900	0.300124
-50	2000	0.324255
-150	2100	0.22011
-250	2200	0.170363
-350	2300	0.478438
-450	2400	0.350299
-550	2500	0.201637
-650	2600	0.510514
-750	2700	0.397359
-850	2800	0.367819
-950	2900	0.288947
-1050	3000	0.178483
-1150	3100	0.111901
-1250	3200	0.447419
-1350	3300	0.213283
-1450	3400	0.034117
-1550	3500	0.0361104

## Sheet: SCP pollution Index
Supplemental Data 1
Article title: Geohistorical records of the Anthropocene in Chile
Eugenia M. Gayo1,2,3*, Virginia B. McRostie4, Roberto Campbell4, Carola Flores1,5, Antonio Maldonado5,6, Mauricio Uribe-Rodriguez7, Patricio I. Moreno1,8, Calogero M. Santoro9, Duncan A. Christie1,10, Ariel A. Muñoz1,11, Laura Gallardo1,12
1 Center for Climate and Resilience Research (CR2, FONDAP 15110009), Chile, 2 Laboratory for Stable Isotope Biogeochemistry, Departamento de Oceanografía, Universidad de Concepción, Concepción, Chile, 3 Center of Applied Ecology and Sustainability (CAPES), 4 Programa de Antropología, Instituto de Sociología, Pontificia Universidad Católica de Chile, Santiago, Chile, 5 Centro de Estudios Avanzados…
Dataset 5: Time-series for the influx of Spheroidal Carbon Particles (SCPs) in four lacustrine basins located around the Santiago and El Teniente mining operation (33°S).
Details for the calculation of the paleofire index are presented in Text S2 (Supplemental Material 1)
Year AD	SCPs pollution index
2002	0.975659
1997	0.826115
1992	0.513874
1987	0.439833
1982	0.350338
1977	0.306926
1972	0.280066
1967	0.298075
1962	0.187311
1957	0.178625
1952	0.100684
1947	0.0819894
1942	0.0688415
1937	0.187982
1932	0.125409
1927	0.116475
1922	0.10403
1917	0.0992795
1912	0.0811191
1907	0.0535192
1902	0.0116545
1897	0.0273101
1892	0.0486573
1887	0.038075
1882	0.0422257
1877	0.125576
1872	0.082799
1867	0.0811011
1862	-0.00471089
1857	0.1942
1852	-0.0597081

## Sheet: Source references
Ávalos, H., A. Didier, P. Andrade, M. Lucero, A. González, E. Valenzuela, G. Carmona, A. Ponce, and A. Román (2006), Nuevas evidencias para Alfarero temprano e Intermedio tardío en el curso inferior del río Aconcagua: El Membrillar 1 y 2 (Concón, región de Valparaíso), in XVII Congreso Nacional de Arqueología Chilena, edited by S. C. d. Arqueología, Valdivia, Chile.
Campbell, R., and D. Quiroz (2015), Chronological database for Southern Chile (35°30'–42° S), ∼33000 BP to present: Human implications and archaeological biases, Quat Int, 356, 39-53, doi: http://dx.doi.org/10.1016/j.quaint.2014.07.026.
Gayo, E. M., C. Latorre, and C. M. Santoro (2015), Timing of occupation and regional settlement patterns revealed by time-series analyses of an archaeological radiocarbon database for the South-Central Andes (16°–25°S), Quat Int, 356(0), 4-14, doi: http://dx.doi.org/10.1016/j.quaint.2014.09.076.
Falabella, F., M. T. Planella, E. Aspillaga, L. Sanhueza, and R. H. Tykot (2007), Dieta en sociedades alfareras de Chile Central: Aporte de análisis de isótopos estables, Chungara, 39, 5-27.
Falabella, F., L. E. Cornejo, L. Sanhueza, and I. Correa (2015), Trends in thermoluminescence date distributions for the Angostura micro-region in Central Chile, Quat Int, 356, 27-38.
Sanchez, R. (2001), El Tawantinsuyo salvaje en el Finis Terrae Australis (Central Chile), Revista Chilena de Antropología, 16, 87-127.
Sanhueza, L., M. Vásquez, and F. Falabella (2003), Las sociedades Alfareras tempranas de la cuenca de Santiago, Chungara, 35, 23-50.
Sanhueza, L., F. Falabella, L. Cornejo, and M. Vásquez (2006), Período Alfarero temprano en Chile Central: Nuevas perspectivas a partir de estudios en la cuenca de Rancagua, paper presented at XVII Congreso Nacional de Arqueología Chilena, Valdivia, Chile.
Troncoso, A., and D. Pavlovic (2013), Historia, Saberes y Prácticas: Un Ensayo Sobre el Desarrollo de las Comunidades Alfareras del Norte Semiárido Chileno, Revista Chilena de Antropología, 27, 101-140.
